# Supplementary material for: Diamine-functionalized porous graphene oxide sheets decorated with palladium oxide nanoparticles for the oxidative amidation of aldehydes
Source: Royal Society of Chemistry journal article supplement (doi:10.1039/d2nj03807b), 2022-01-01
Supplement: d2nj03807b1.pdf [file d2nj03807b1.pdf]

**Electronic Supplementary Information**.....

**Diamine-functionalized porous graphene oxide sheet decorated with palladium oxide nanoparticles for the oxidative amidation of aldehydes**

Digvijay Sah<sup>a</sup>, Surabhi<sup>a</sup>, Padmini Gupta<sup>a</sup>, Javaid Shabir<sup>a</sup>, Manjeet Dhama<sup>a</sup> and Subho Mozumdar<sup>a\*</sup>

<sup>a</sup>Department of Chemistry, University of Delhi, Delhi-110007, India

\*Corresponding Author: Email – [subhoscom@yahoo.co.in](mailto:subhoscom@yahoo.co.in)

## Table of Contents

|                                                                                                                                                                                     |         |
|-------------------------------------------------------------------------------------------------------------------------------------------------------------------------------------|---------|
| Spectral data of representative products                                                                                                                                            | S3-S24  |
| Fig. S23: SAED pattern of PGO-NH <sub>2</sub> @PdO nano-catalyst.                                                                                                                   | S25     |
| Calculation of green chemistry matrices                                                                                                                                             | S25-S26 |
| <b>Table S1:</b> CHNS analysis of GO, PGO-COOH, PGO-COCl, PGO-NH <sub>2</sub> and PGO-NH <sub>2</sub> @PdO                                                                          | S26     |
| <b>Table S2:</b> A comparison of the TON and TOF of PGO-NH <sub>2</sub> @PdO nano-catalyst with several heterogeneous catalysts previously reported for amide derivative synthesis. | S27     |
| References                                                                                                                                                                          | S27     |

## Spectral Data of Representative Products

### 1. 4-nitro-N-phenylbenzamide

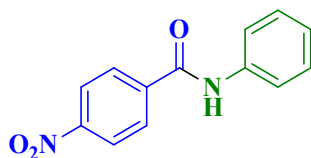

Yellow solid

**<sup>1</sup>H-NMR (400 MHz, CDCl<sub>3</sub>):** δ 8.55 (s, 1H), 8.32 (d, 2H, J = 8.8 Hz), 8.07 (d, 2H, J = 8.8 Hz), 7.42 (t, 2H, J = 8 Hz), 7.24-7.31 (m, 3H) ppm. **<sup>13</sup>C-NMR (75 MHz, CDCl<sub>3</sub>):** δ 157.47, 151.00, 149.37, 141.65, 129.50, 129.43, 127.17, 124.11, 121.05 ppm. **HRMS (ES):** Calcd: 242.0691. Found: 243.0741 [M+H]<sup>+</sup> and 244.0721 [MH+2]<sup>+</sup>.

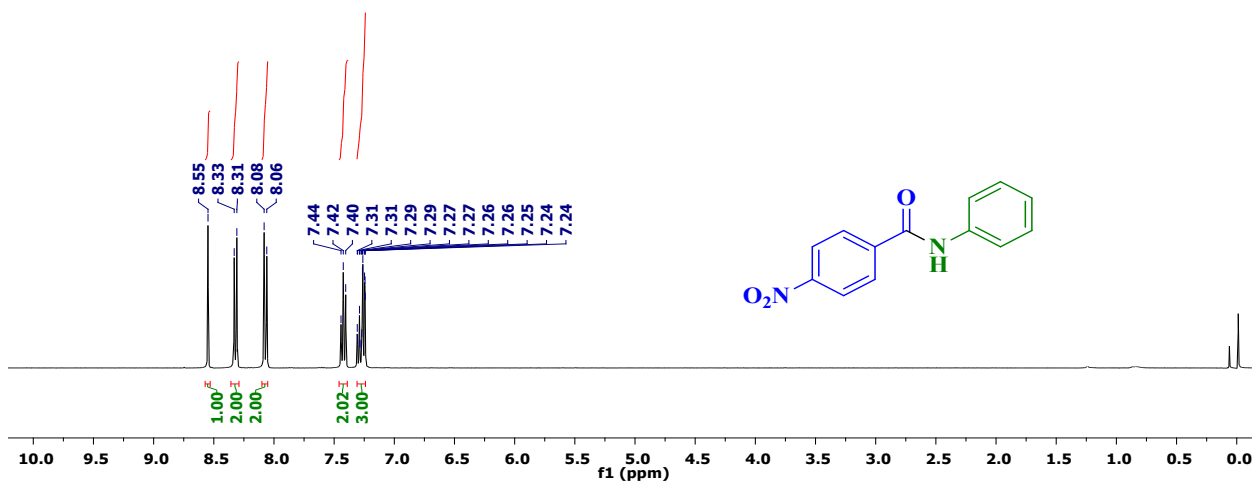

Fig. S1 (a): <sup>1</sup>H-NMR of 4-nitro-N-phenylbenzamide

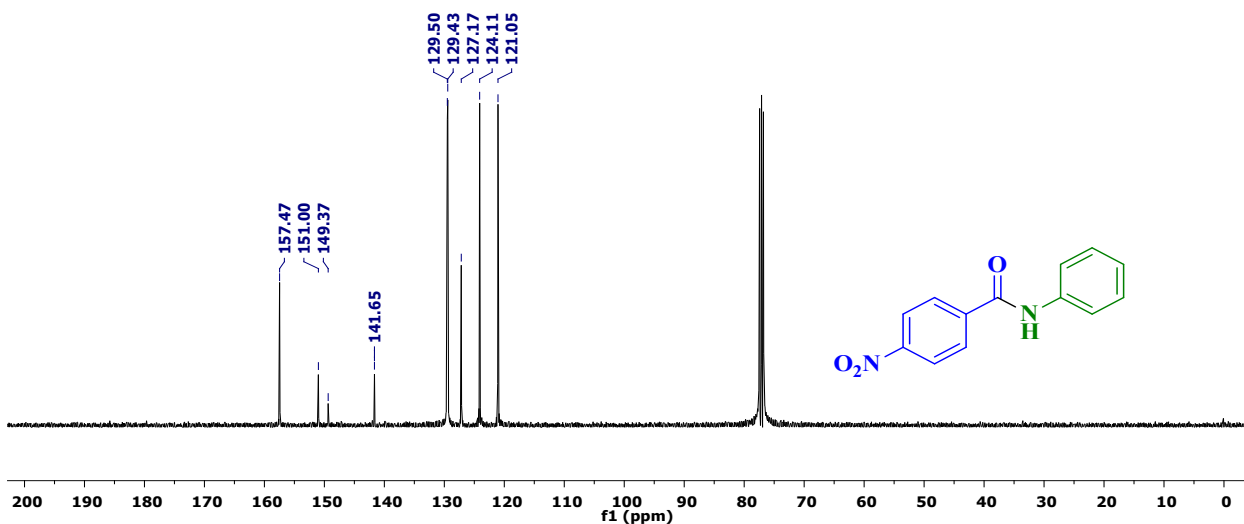

Fig. S1 (b): <sup>13</sup>C-NMR of 4-nitro-N-phenylbenzamide

## 2. N-(p-tolyl)benzamide

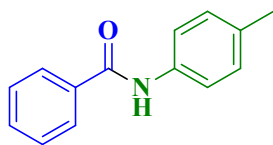

Orange solid

**<sup>1</sup>H-NMR (400 MHz, CDCl<sub>3</sub>):** δ 8.48 (s, 1H), 7.90-7.92 (m, 2H), 7.46-7.50 (m, 3H), 7.15-7.23 (m, 4H), 2.39 (s, 3H) ppm. **<sup>13</sup>C-NMR (75 MHz, CDCl<sub>3</sub>):** δ 159.76, 149.53, 136.42, 135.93, 131.34, 129.89, 128.83, 120.94, 21.15 ppm. **HRMS (ES):** Calcd: 211.0997. Found: 212.1037 [M+H]<sup>+</sup> and 213.1048 [MH+2]<sup>+</sup>.

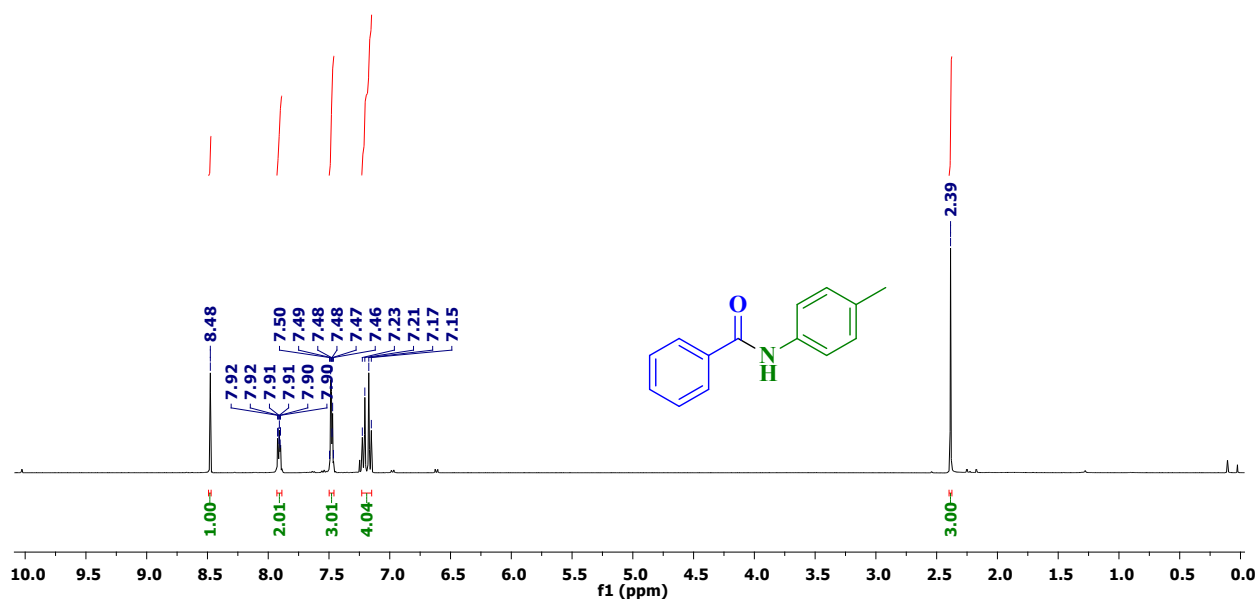

Fig. S2 (a): <sup>1</sup>H-NMR of N-(p-tolyl)benzamide

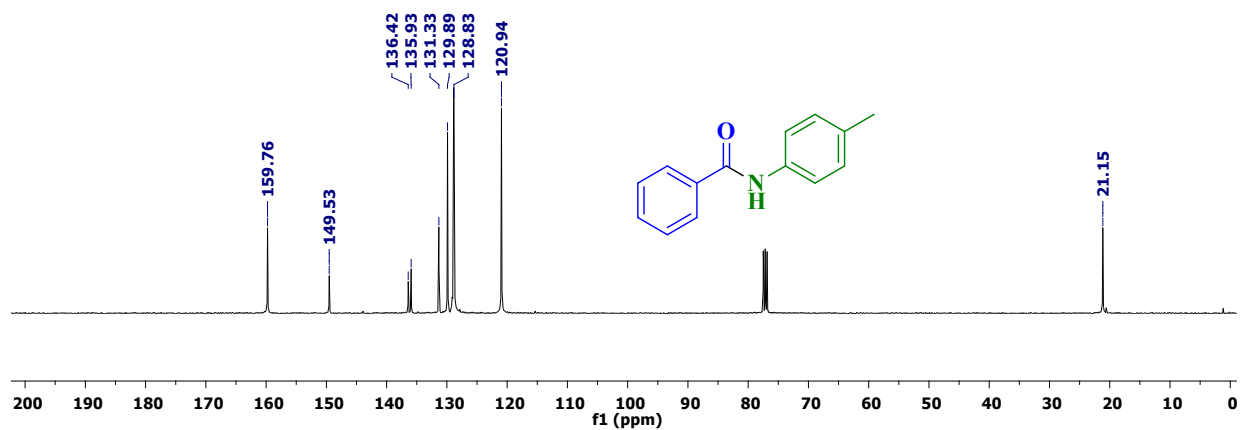

Fig. S2 (b): <sup>13</sup>C-NMR of N-(p-tolyl)benzamide

### 3. 4-nitro-N-(p-tolyl)benzamide

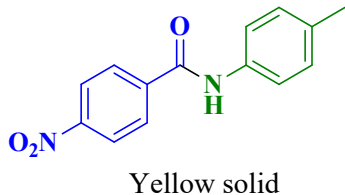

**<sup>1</sup>H-NMR (400 MHz, CDCl<sub>3</sub>):** δ 8.56 (s, 1H), 8.31 (d, 2H, J = 8.8 Hz), 8.06 (d, 2H, J = 8.8 Hz), 7.17-7.24 (m, 4H), 2.38 (s, 3H) ppm. **<sup>13</sup>C-NMR (75 MHz, CDCl<sub>3</sub>):** δ 156.46, 149.22, 148.32, 141.85, 137.35, 130.05, 129.37, 124.10, 121.09, 21.20 ppm. **HRMS (ES):** Calcd: 256.0848. Found: 257.0878. [M+H]<sup>+</sup> and 258.0898 [MH+2]<sup>+</sup>.

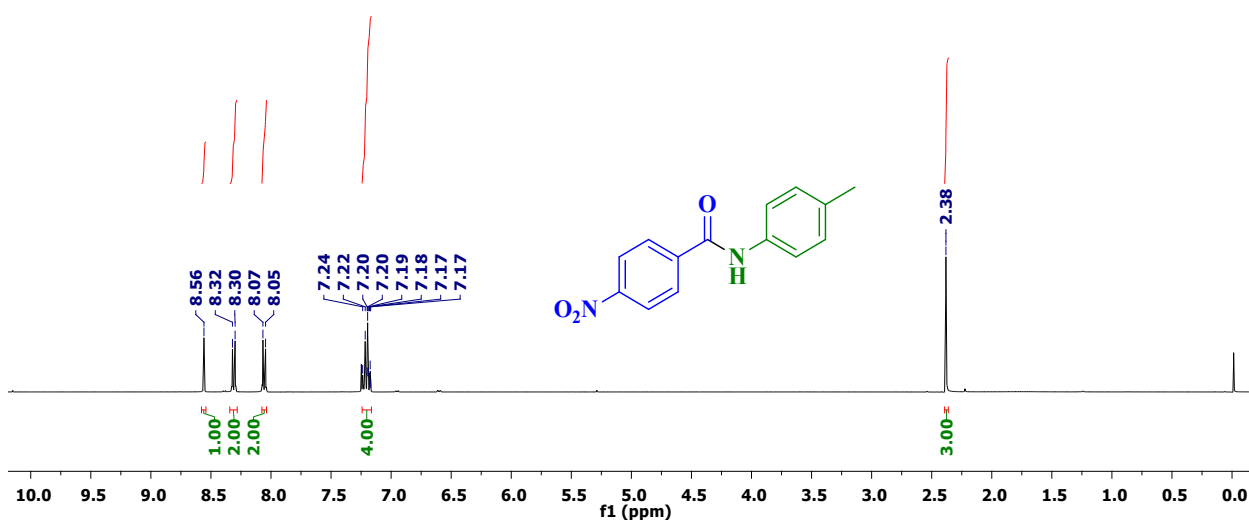

Fig. S3 (a): <sup>1</sup>H-NMR of 4-nitro-N-(p-tolyl)benzamide

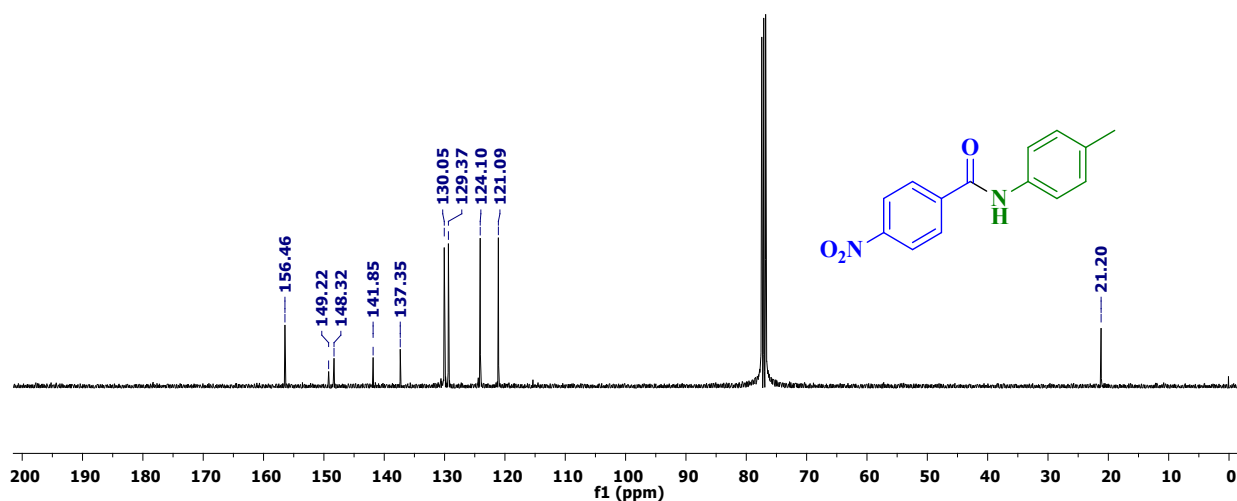

Fig. S3 (b): <sup>13</sup>C-NMR of 4-nitro-N-(p-tolyl)benzamide

#### 4. 2-nitro-N-(p-tolyl)benzamide

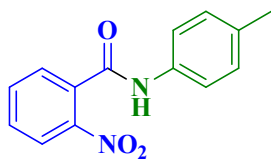

Brown solid

**<sup>1</sup>H-NMR (400 MHz, CDCl<sub>3</sub>):** δ 8.94 (s, 1H), 8.30 (d, 1H, J = 8 Hz), 8.05 (d, 1H, J = 8.4 Hz), 7.72 (t, 1H, J = 8 Hz), 7.57-7.61 (m, 1H), 7.21(s, 4H), 2.38 (s, 3H) ppm. **<sup>13</sup>C-NMR (75 MHz, CDCl<sub>3</sub>):** δ 154.93, 149.33, 148.53, 137.11, 133.65, 131.34, 131.10, 129.99, 129.78, 124.61, 121.29, 21.17 ppm. **HRMS (ES):** Calcd: 256.0848. Found: 257.0888 [M+H]<sup>+</sup> and 258.0898 [MH+2]<sup>+</sup>.

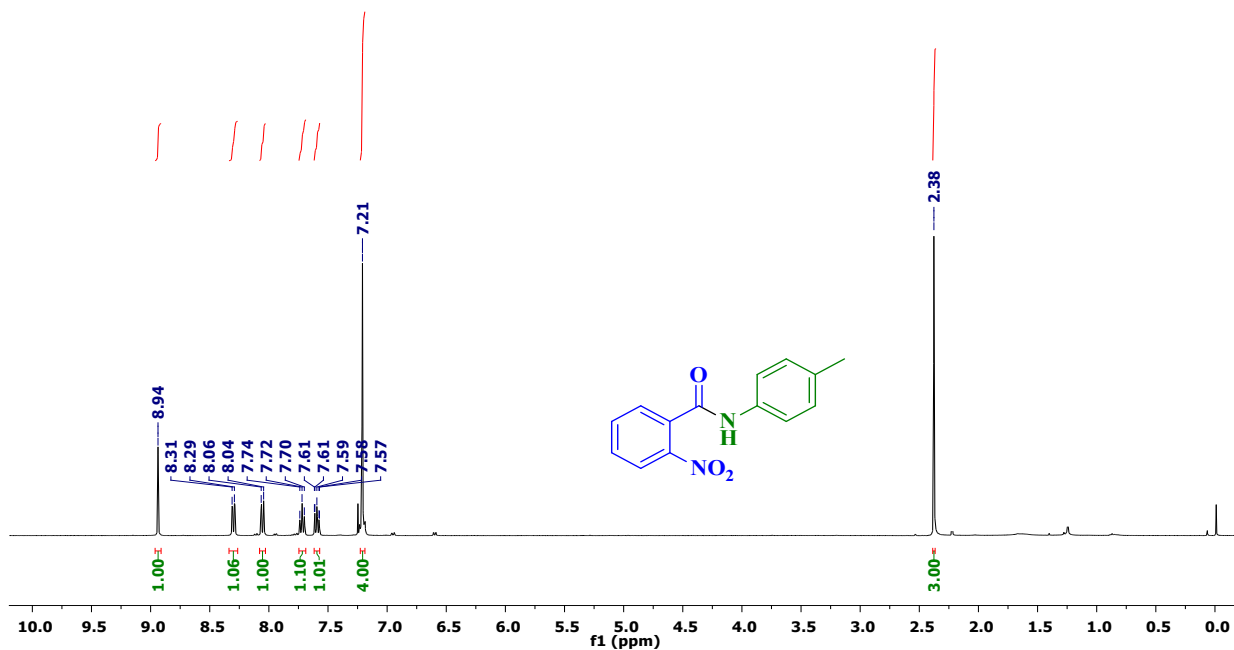

Fig. S4 (a): <sup>1</sup>H-NMR of 2-nitro-N-(p-tolyl)benzamide

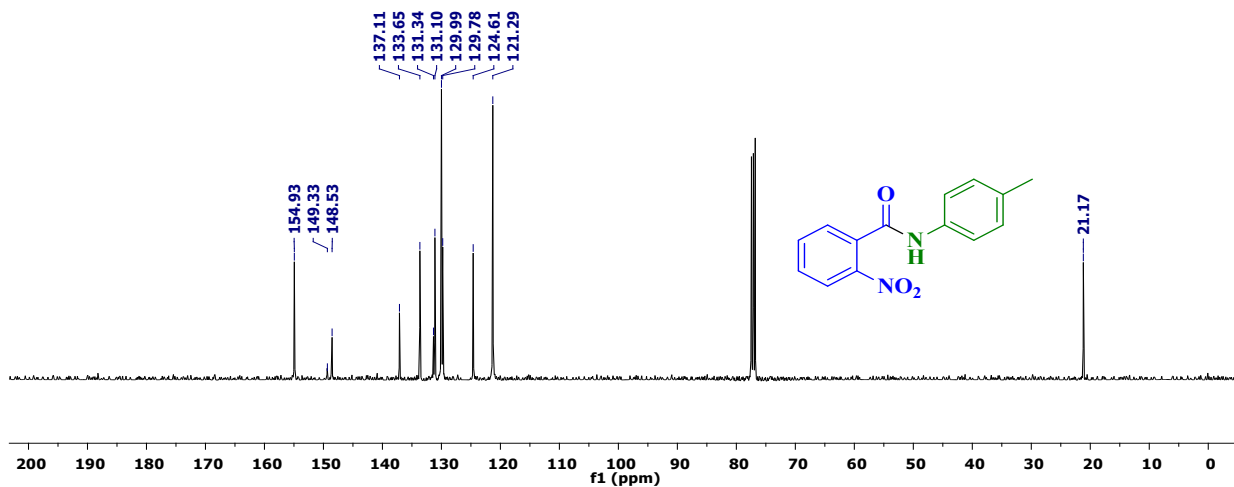

Fig. S4 (b): <sup>13</sup>C-NMR of 2-nitro-N-(p-tolyl)benzamide

## 5. 4-methyl-N-(p-tolyl)benzamide

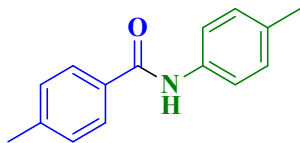

Brown solid

**<sup>1</sup>H-NMR (400 MHz, CDCl<sub>3</sub>):** δ 8.42 (s, 1H), 7.78 (d, 2H, J = 8 Hz), 7.26 (d, 2H, J = 7.6 Hz), 7.11-7.20 (m, 4H), 2.41 (s, 3H), 2.36 (s, 3H) ppm. **<sup>13</sup>C-NMR (75 MHz, CDCl<sub>3</sub>):** δ 159.72, 149.70, 141.76, 135.66, 133.85, 129.82, 129.58, 128.79, 120.89, 21.71, 21.09 ppm. **HRMS (ES):** Calcd: 225.1154. Found: 226.1204 [M+H]<sup>+</sup> and 227.1194 [MH+2]<sup>+</sup>.

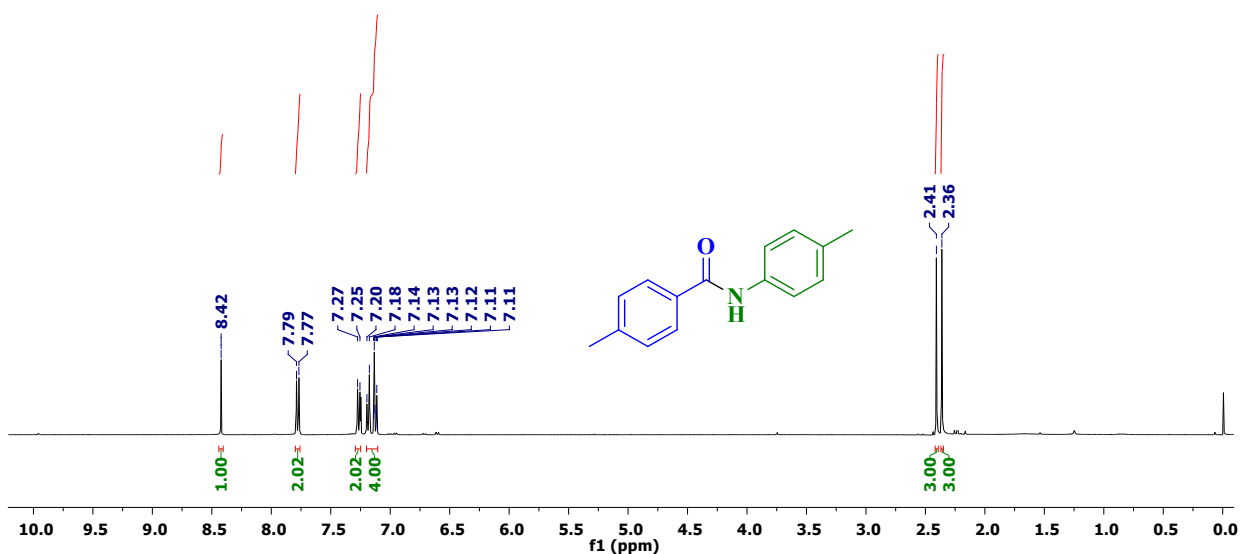

Fig. S5 (a): <sup>1</sup>H-NMR 4-methyl-N-(p-tolyl)benzamide

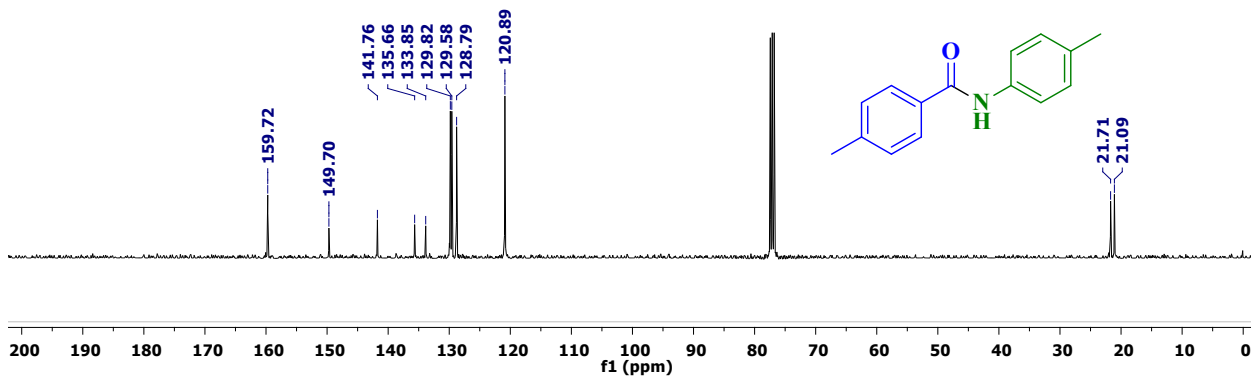

Fig. S5 (b): <sup>13</sup>C-NMR of 4-methyl-N-(p-tolyl)benzamide

## 6. 2-methoxy-N-(p-tolyl)benzamide

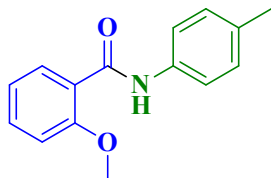

Orange solid

**<sup>1</sup>H-NMR (400 MHz, CDCl<sub>3</sub>):** δ 9.01 (s, 1H), 8.23 (d, 1H, J = 8 Hz), 7.45 (t, 1H, J = 7.6 Hz), 7.23 (s, 4H), 7.08 (t, 1H, J = 7.6 Hz), 6.95 (d, 1H, J = 8.4 Hz), 3.88 (s, 3H), 2.41 (s, 3H) ppm. **<sup>13</sup>C-NMR (75 MHz, CDCl<sub>3</sub>):** δ 159.56, 155.79, 150.31, 135.65, 132.70, 129.86, 127.57, 124.97, 121.21, 120.99, 111.23, 55.63, 21.18 ppm. **HRMS (ES):** Calcd: 241.1103. Found: 242.1153 [M+H]<sup>+</sup> and 243.1143 [MH+2]<sup>+</sup>.

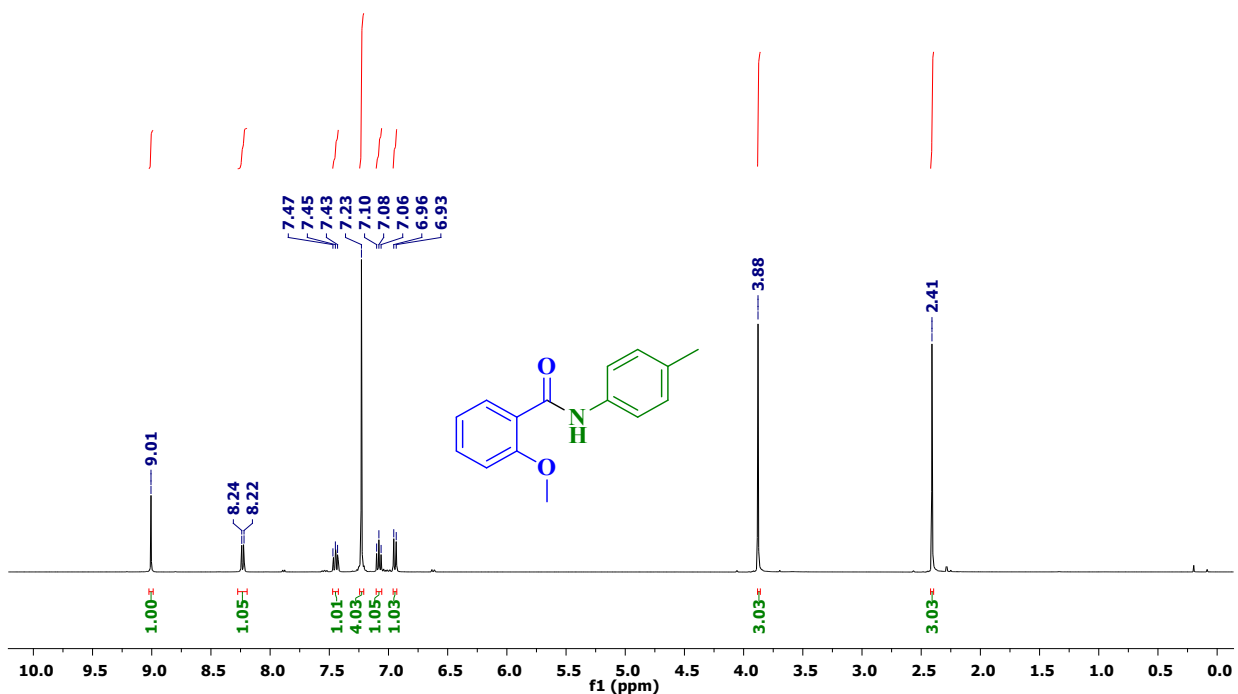

Fig. S6 (a): <sup>1</sup>H-NMR of 2-methoxy-N-(p-tolyl)benzamide

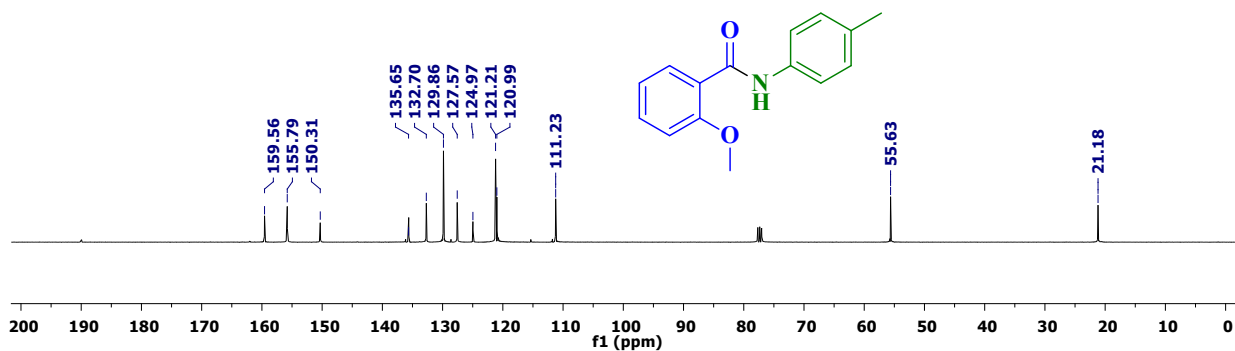

Fig. S6 (b): <sup>13</sup>C-NMR of 2-methoxy-N-(p-tolyl)benzamide



## 7. 4-chloro-N-(p-tolyl)benzamide

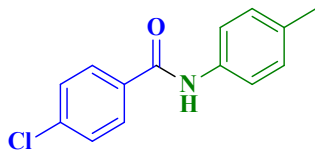

Brown solid

**<sup>1</sup>H-NMR (400 MHz, CDCl<sub>3</sub>):** δ 8.42 (s, 1H), 7.82 (d, 2H, J = 8.4 Hz), 7.43 (d, 2H, J = 8.4 Hz), 7.12-7.20 (m, 4H), 2.36 (s, 3H) ppm. **<sup>13</sup>C-NMR (75 MHz, CDCl<sub>3</sub>):** δ 158.13, 149.09, 137.24, 136.24, 134.89, 131.02, 129.90, 129.91, 129.14, 120.90, 21.13 ppm. **HRMS (ES):** Calcd: 245.0607. Found: 246.0647 [M+H]<sup>+</sup> and 247.0637 [MH+2]<sup>+</sup>.

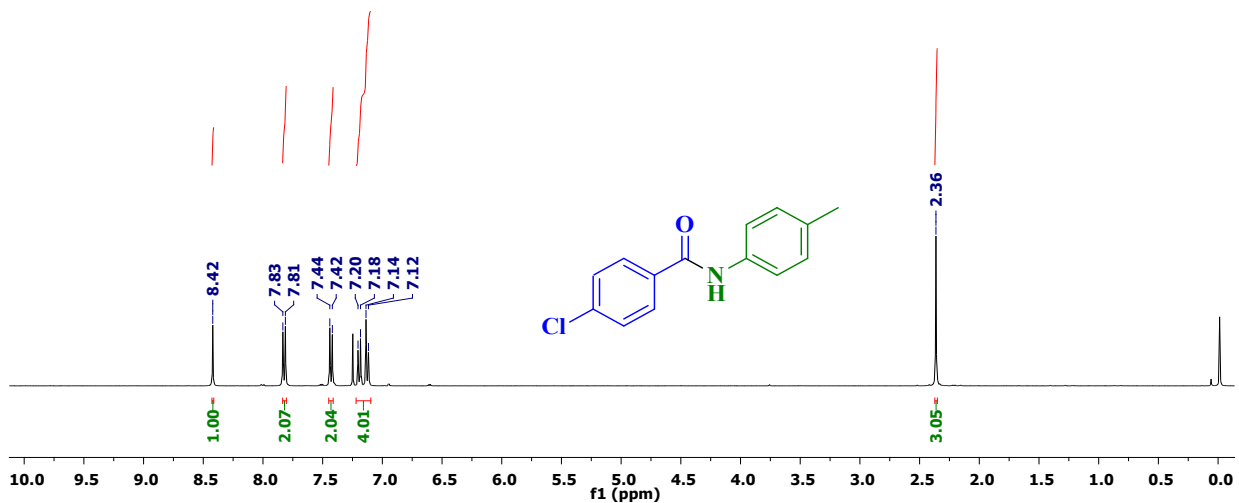

Fig. S7 (a): <sup>1</sup>H-NMR of 4-chloro-N-(p-tolyl)benzamide

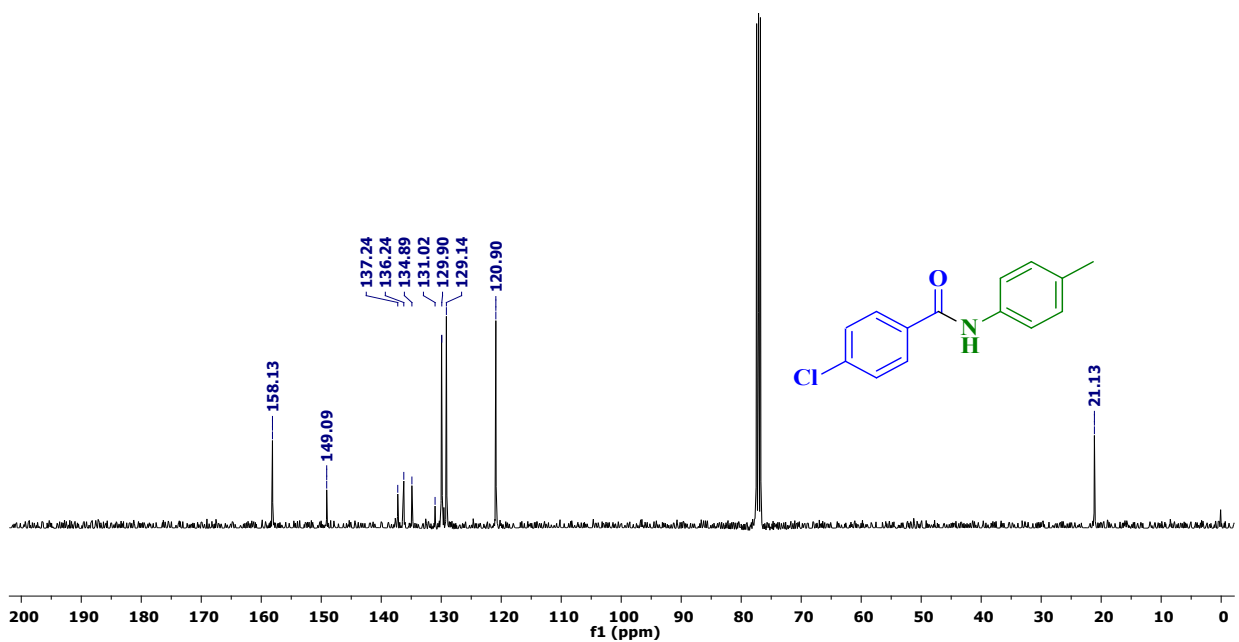

Fig. S7 (b): <sup>13</sup>C-NMR of 4-chloro-N-(p-tolyl)benzamide

## 8. 3-hydroxy-N-(p-tolyl)benzamide

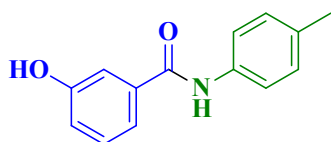

Brown solid

**<sup>1</sup>H-NMR (400 MHz, CDCl<sub>3</sub>):** δ 8.33 (s, 1H), 7.40 (s, 1H), 7.30-7.32 (m, 1H), 7.25 (t, 1H, J = 8 Hz), 7.11-7.18 (m, 4H), 6.93 (d, 1H, J = 7.6 Hz), 2.34 (s, 3H) ppm. **<sup>13</sup>C-NMR (75 MHz, CDCl<sub>3</sub>):** δ 161.08, 156.84, 148.58, 137.01, 136.42, 130.18, 130.02, 122.02, 121.07, 119.51, 114.61, 21.13 ppm. **HRMS (ES):** Calcd: 227.0946. Found: 228.0996 [M+H]<sup>+</sup> and 229.0986 [MH+2]<sup>+</sup>.

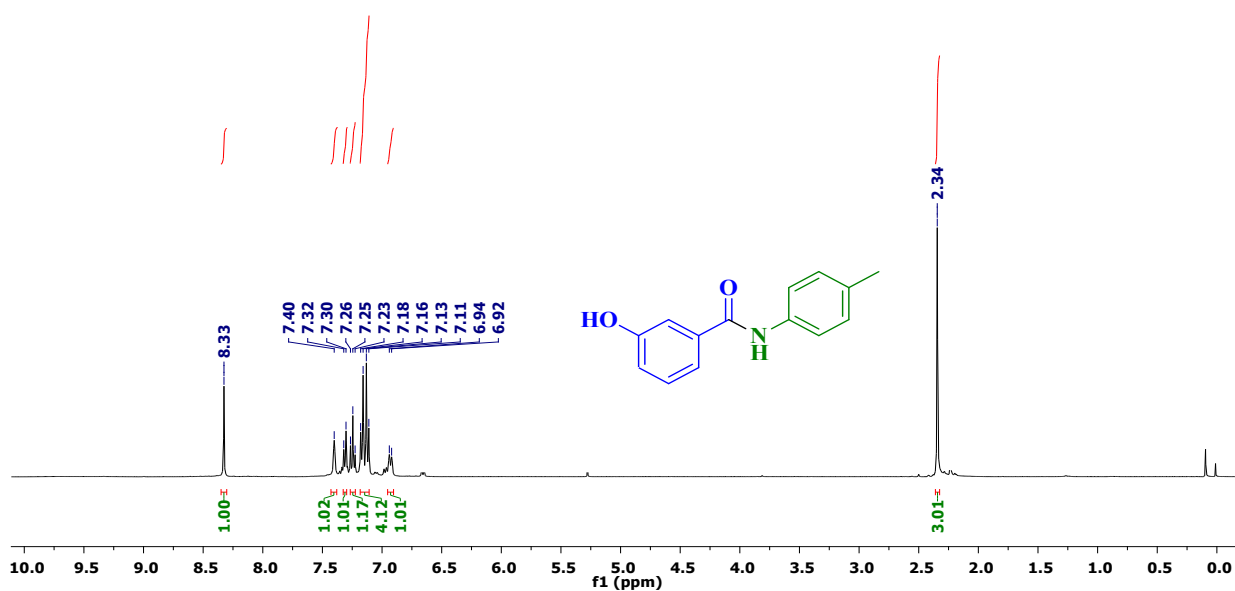

Fig. S8 (a): <sup>1</sup>H-NMR of 3-hydroxy-N-(p-tolyl)benzamide

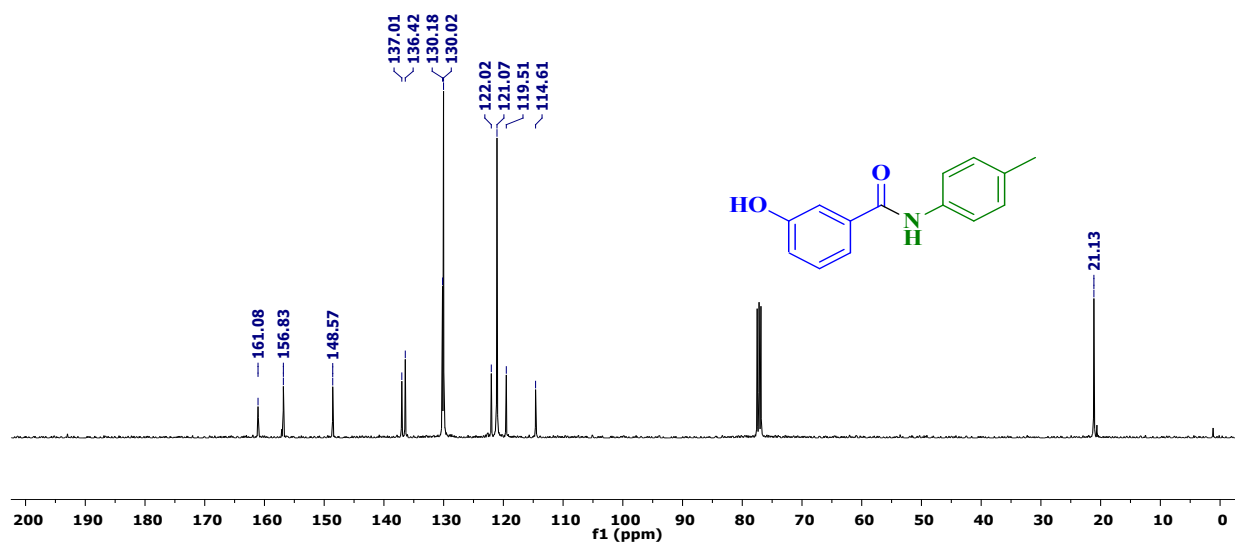

Fig. S8 (b): <sup>13</sup>C-NMR of 3-hydroxy-N-(p-tolyl)benzamide

## 9. N-(p-tolyl)thiophene-2-carboxamide

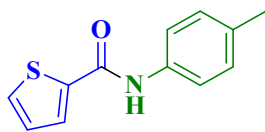

Brown solid

**<sup>1</sup>H-NMR (400 MHz, CDCl<sub>3</sub>):** δ 8.57 (s, 1H), 7.48 (d, 1H, J = 5.2 Hz), 7.45 (d, 1H, J = 3.6 Hz), 7.17-7.19 (m, 2H), 7.11-7.14 (m, 3H), 2.36 (s, 3H) ppm. **<sup>13</sup>C-NMR (75 MHz, CDCl<sub>3</sub>):** δ 152.42, 148.89, 143.06, 136.03, 132.07, 130.16, 129.87, 127.83, 121.02, 21.15 ppm. **HRMS (ES):** Calcd: 217.0561. Found: 218.0601 [M+H]<sup>+</sup> and 219.0591 [MH+2]<sup>+</sup>.

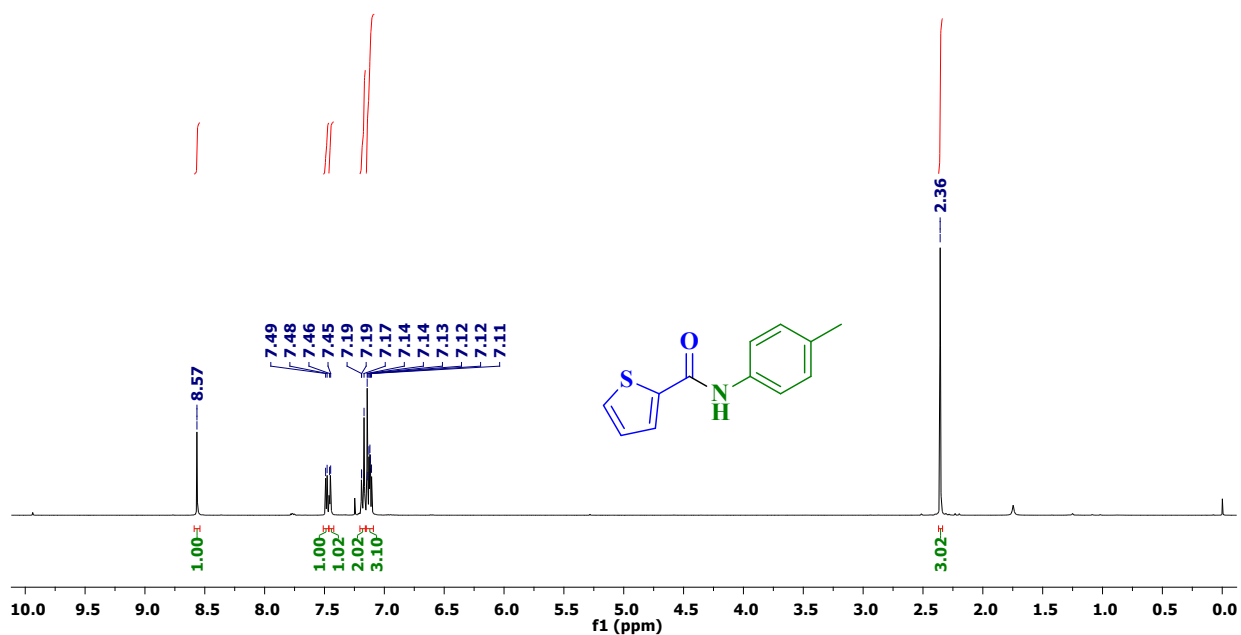

Fig. S9 (a): <sup>1</sup>H-NMR of N-(p-tolyl)thiophene-2-carboxamide

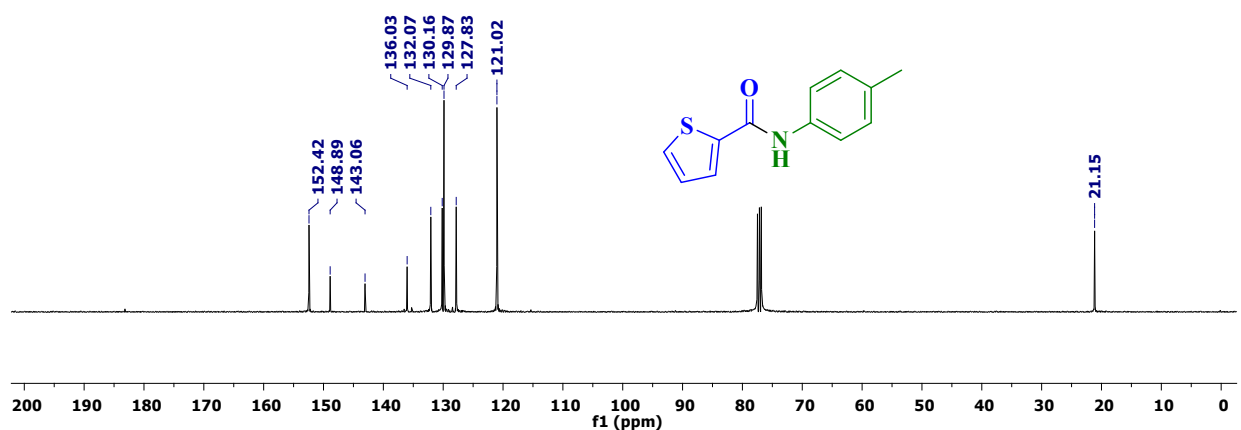

Fig. S9 (b): <sup>13</sup>C-NMR of N-(p-tolyl)thiophene-2-carboxamide

## 10. 5-bromo-2-hydroxy-4-nitro-N-(p-tolyl)benzamide

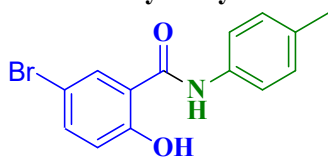

Yellow solid

**<sup>1</sup>H-NMR (400 MHz, CDCl<sub>3</sub>):** δ 13.41 (brs, 1H), 8.54 (s, 1H), 7.49 (s, 1H), 7.43 (d, 1H, 8.8 Hz), 7.18-7.24 (m, 4H), 6.92 (d, 1H, J = 8.8 Hz), 2.39 (s, 3H) ppm. **<sup>13</sup>C-NMR (75 MHz, CDCl<sub>3</sub>):** δ 160.15, 145.31, 137.50, 135.45, 134.09, 130.12, 121.04, 120.71, 119.23, 110.43, 21.10 ppm. **HRMS (ES):** Calcd: 349.9902. Found: 350.9932 [M+H]<sup>+</sup> and 351.9942 [MH+2]<sup>+</sup>.

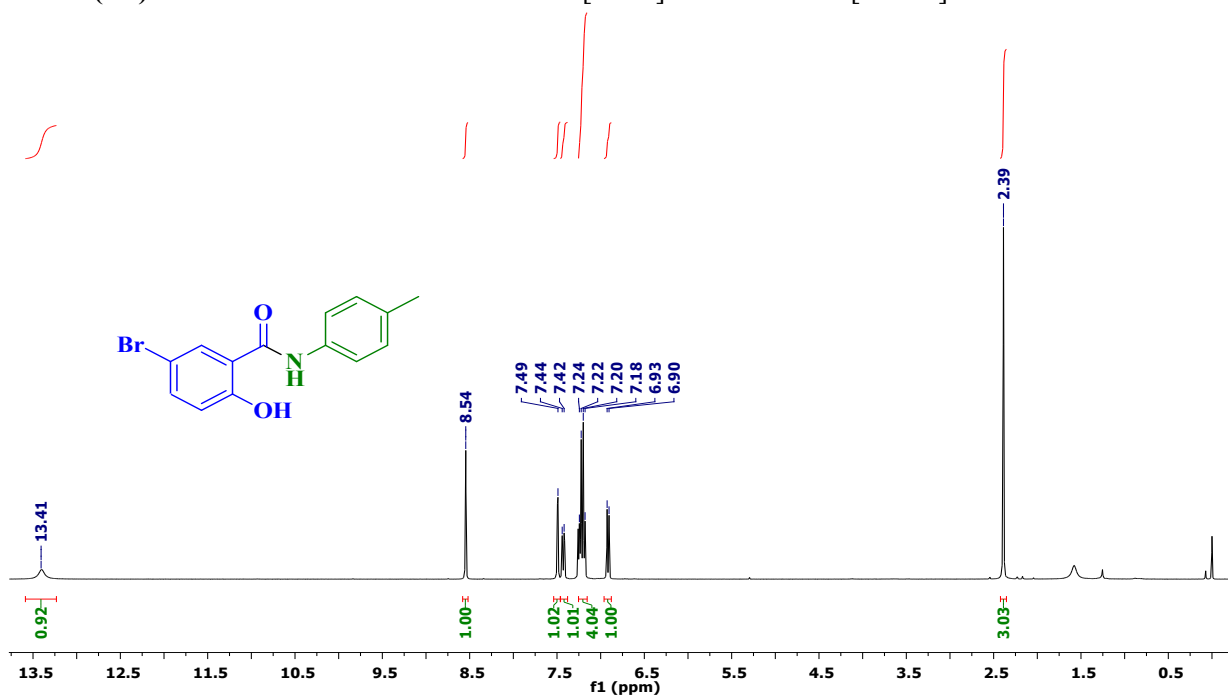

Fig. S10 (a): <sup>1</sup>H-NMR of 5-bromo-2-hydroxy-N-(p-tolyl)benzamide

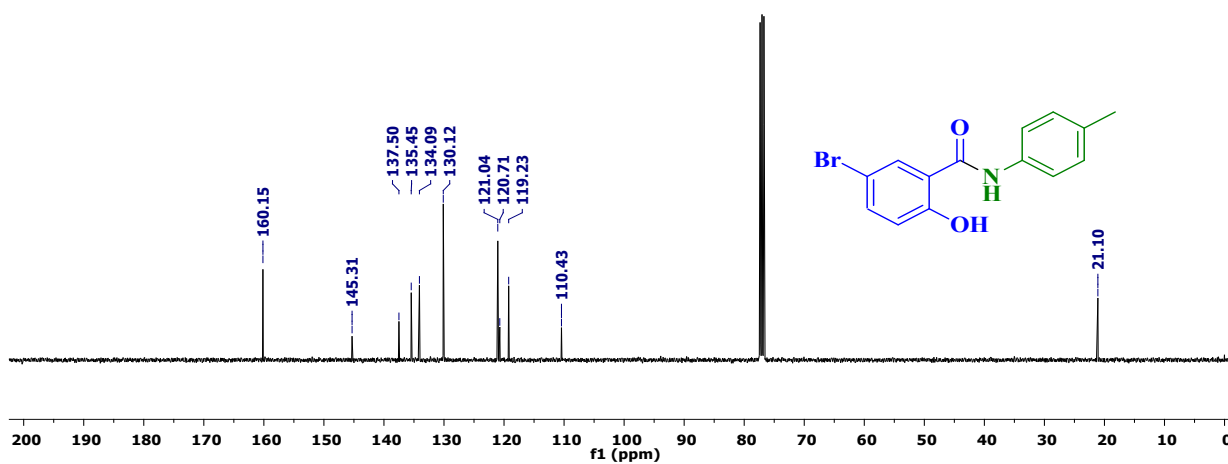

Fig. S10 (b): <sup>13</sup>C-NMR of 5-bromo-2-hydroxy-N-(p-tolyl)benzamide

### 11. 3,5-dichloro-2-hydroxy-N-(p-tolyl)benzamide

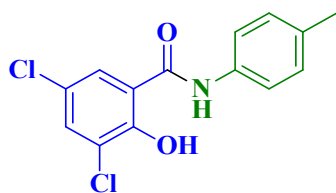

Reddish Brown solid

**<sup>1</sup>H-NMR (400 MHz, CDCl<sub>3</sub>):** δ 14.48 (brs, 1H), 8.55 (s, 1H), 7.43 (d, 1H, J = 2.4 Hz), 7.28 (d, 1H, 2.8 Hz), 7.19-7.23 (m, 4H), 2.38 (s, 3H) ppm. **<sup>13</sup>C-NMR (75 MHz, CDCl<sub>3</sub>):** δ 159.22, 156.22, 144.12, 138.26, 132.54, 130.32, 129.64, 123.26, 122.89, 121.13, 120.30, 21.23 ppm. **HRMS (ES):** Calcd: 295.0167. Found: 296.0217 [M+H]<sup>+</sup> and 297.0197 [MH+2]<sup>+</sup>.

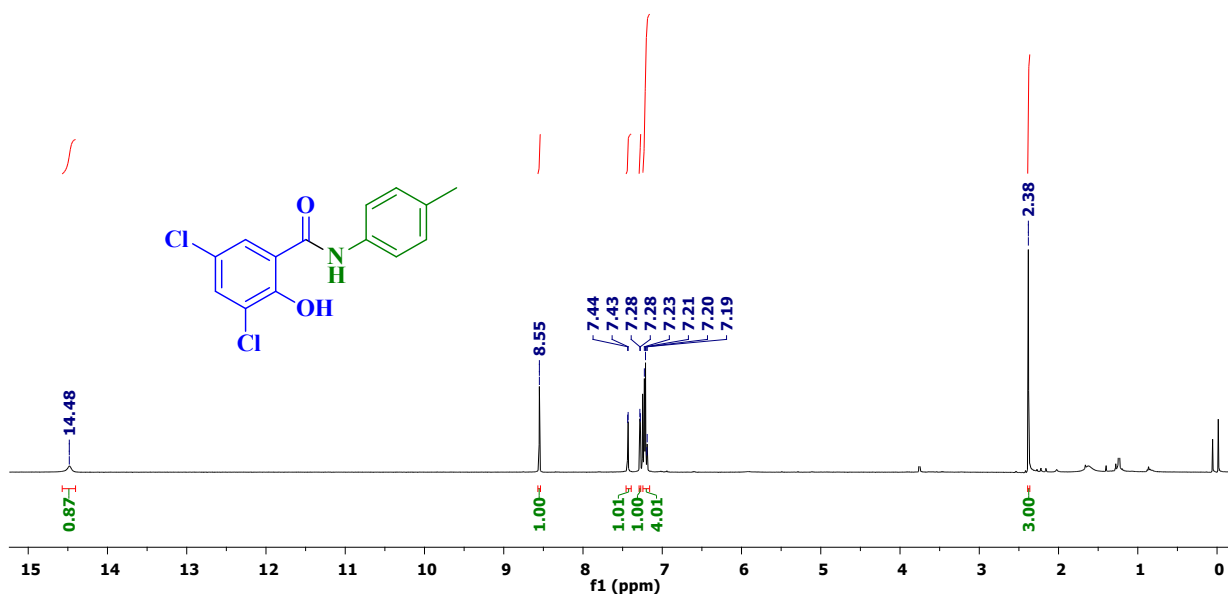

Fig. S11 (a): <sup>1</sup>H-NMR of 3,5-dichloro-2-hydroxy-N-(p-tolyl)benzamide

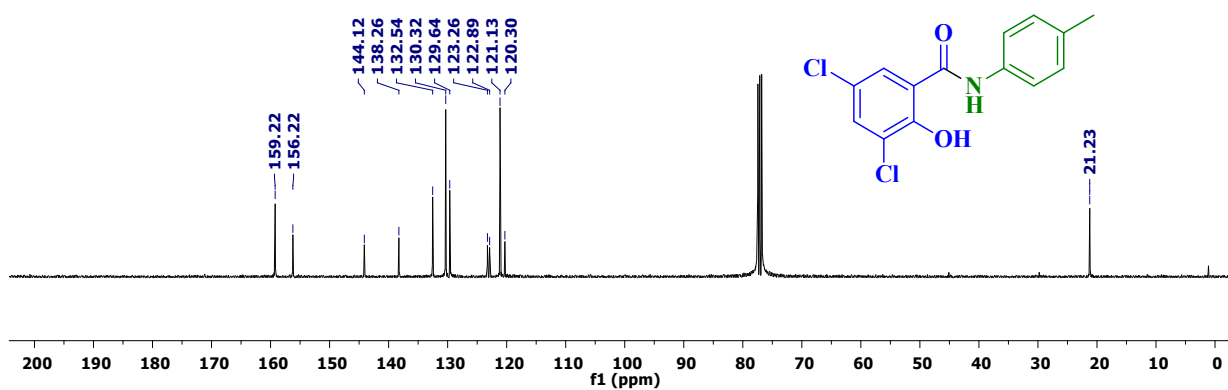

Fig. S11 (b): <sup>13</sup>C-NMR of 3,5-dichloro-2-hydroxy-N-(p-tolyl)benzamide

## 12. N-phenylbenzamide

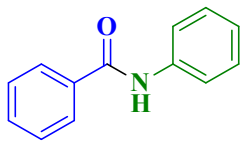

Yellow Solid

**<sup>1</sup>H-NMR (400 MHz, CDCl<sub>3</sub>):** δ 8.46 (s, 1H), 7.87-7.92 (m, 2H), 7.48 (d, 1H, J = 2 Hz), 7.47 (d, 1H, J = 1.6 Hz) 7.37-7.41 (m, 3H), 7.19-7.23 (m, 3H) ppm. **<sup>13</sup>C-NMR (75 MHz, CDCl<sub>3</sub>):** δ 160.53, 152.16, 136.29, 131.47, 129.23, 128.90, 128.86, 126.02, 120.95 ppm. **HRMS (ES):** Calcd: 197.0841. Found: 198.0881 [M+H]<sup>+</sup> and 199.0871 [MH+2]<sup>+</sup>.

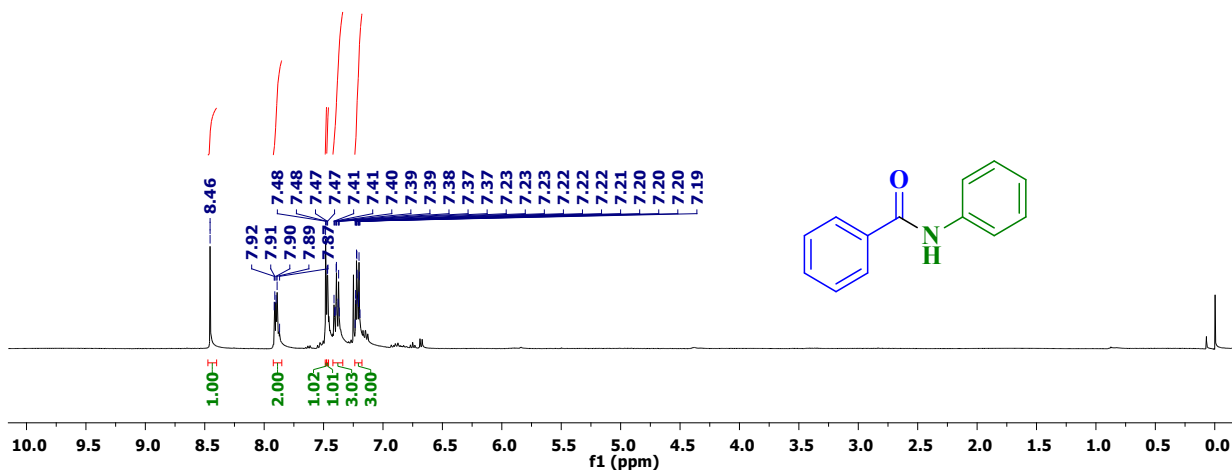

Fig. S12 (a): <sup>1</sup>H-NMR of N-phenylbenzamide

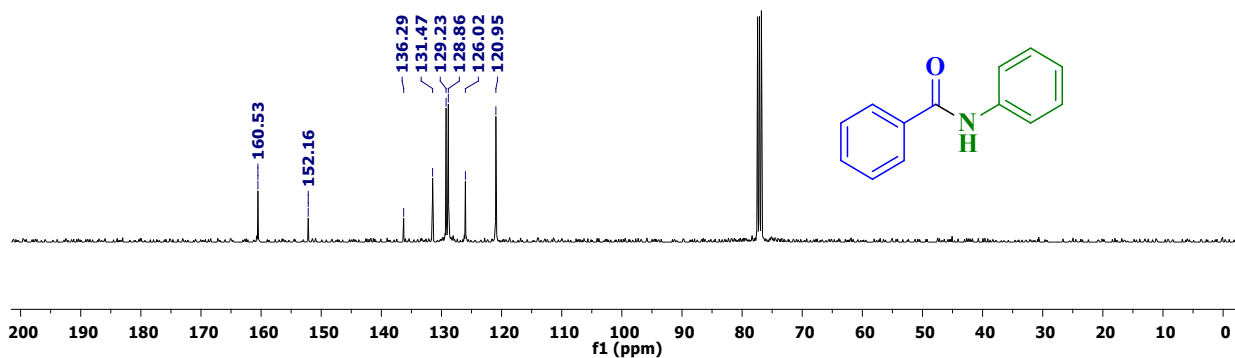

Fig. S12 (b): <sup>13</sup>C-NMR of N-phenylbenzamide

### 13. N-(p-tolyl)-[1,1'-biphenyl]-4-carboxamide

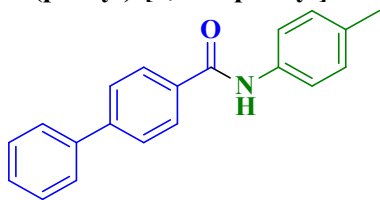

Yellow solid

**<sup>1</sup>H-NMR (400 MHz, CDCl<sub>3</sub>):** δ 8.49 (s, 1H), 7.95 (d, 2H, J = 8 Hz), 7.69 (d, 2H, J = 8.4 Hz), 7.64 (d, 2H, J = 7.2 Hz), 7.45 (t, 2H, J = 8 Hz), 7.37 (t, 1H, J = 7.2 Hz), 7.15-7.21 (m, 4H), 2.37 (s, 3H) ppm. **<sup>13</sup>C-NMR (75 MHz, CDCl<sub>3</sub>):** δ 159.14, 149.52, 143.91, 140.35, 135.88, 135.36, 129.83, 129.23, 128.93, 127.90, 127.46, 127.21, 120.90, 21.07 ppm. **HRMS (ES):** Calcd: 287.1310. Found: 288.1331 [M+H]<sup>+</sup> and 289.1342 [MH+2]<sup>+</sup>.

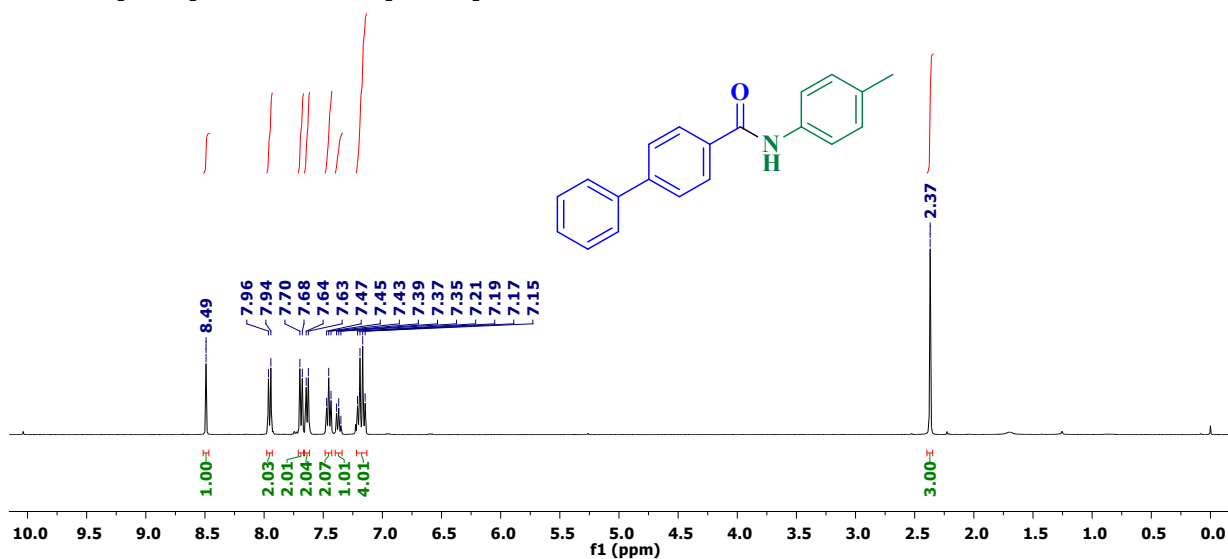

Fig. S13 (a): <sup>1</sup>H-NMR of N-(p-tolyl)-[1,1'-biphenyl]-4-carboxamide

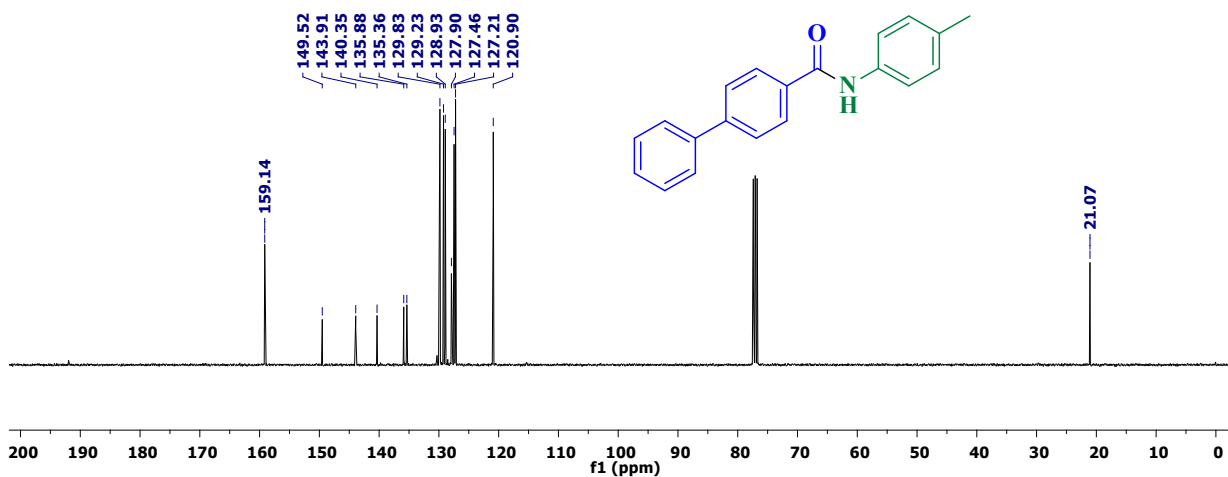

Fig. S13 (b): <sup>13</sup>C-NMR of N-(p-tolyl)-[1,1'-biphenyl]-4-carboxamide

#### 14. 3,4,5-trimethoxy-N-(p-tolyl)benzamide

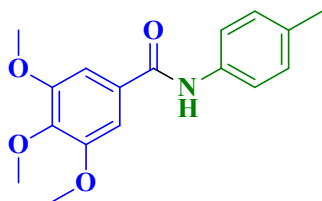

Pale Yellow solid

**<sup>1</sup>H-NMR (400 MHz, CDCl<sub>3</sub>):** δ 8.36 (s, 1H), 7.19 (d, 2H, J = 8 Hz), 7.12-7.15 (m, 4H), 3.94 (s, 6H), 3.91 (s, 3H), 2.37 (s, 3H) ppm. **<sup>13</sup>C-NMR (75 MHz, CDCl<sub>3</sub>):** δ 159.10, 153.52, 149.36, 140.84, 135.76, 131.90, 129.79, 120.80, 105.69, 60.99, 56.26, 21.01 ppm. **HRMS (ES):** Calcd: 301.1314. Found: 302.1326 [M+H]<sup>+</sup> and 303.1321 [MH+2]<sup>+</sup>.

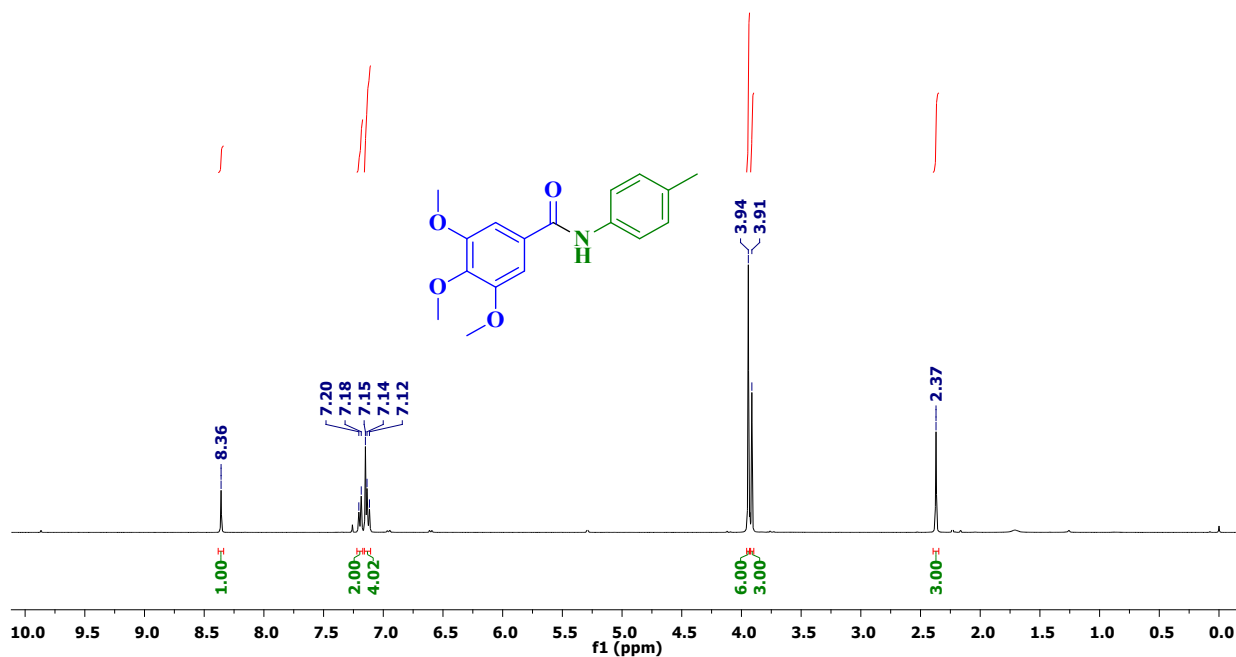

Fig. S14 (a): <sup>1</sup>H-NMR of 3,4,5-trimethoxy-N-(p-tolyl)benzamide

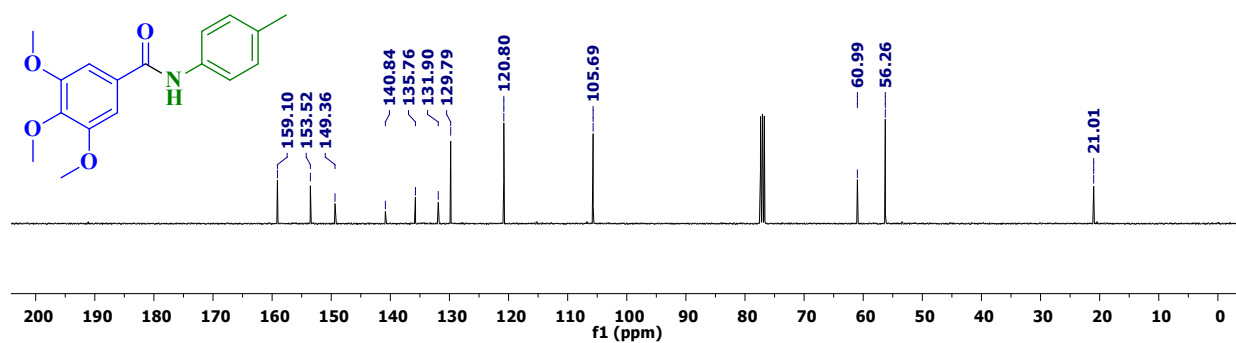

Fig. S14 (b): <sup>13</sup>C-NMR of 3,4,5-trimethoxy-N-(p-tolyl)benzamide



## 15. N-(p-tolyl)propionamide

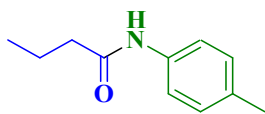

Brownish Liquid

**<sup>1</sup>H-NMR (400 MHz, CDCl<sub>3</sub>):** δ 7.11 (s, 1H), 6.94 (d, 2H, J = 7.6 Hz), 6.59 (d, 2H, J = 8 Hz), 2.22 (s, 3H), 2.17 (t, 2H, J = 8.4 Hz), 1.07-1.12 (m, 2H), 0.97 (t, 3H, J = 7.6 Hz) ppm. **<sup>13</sup>C-NMR (75 MHz, CDCl<sub>3</sub>):** δ 163.95, 141.12, 134.84, 129.78, 120.71, 41.94, 20.42, 19.05, 13.78 ppm. **HRMS (ES):** Calcd: 163.0997. Found: 164.0992 [M+H]<sup>+</sup> and 165.0998 [MH+2]<sup>+</sup>.

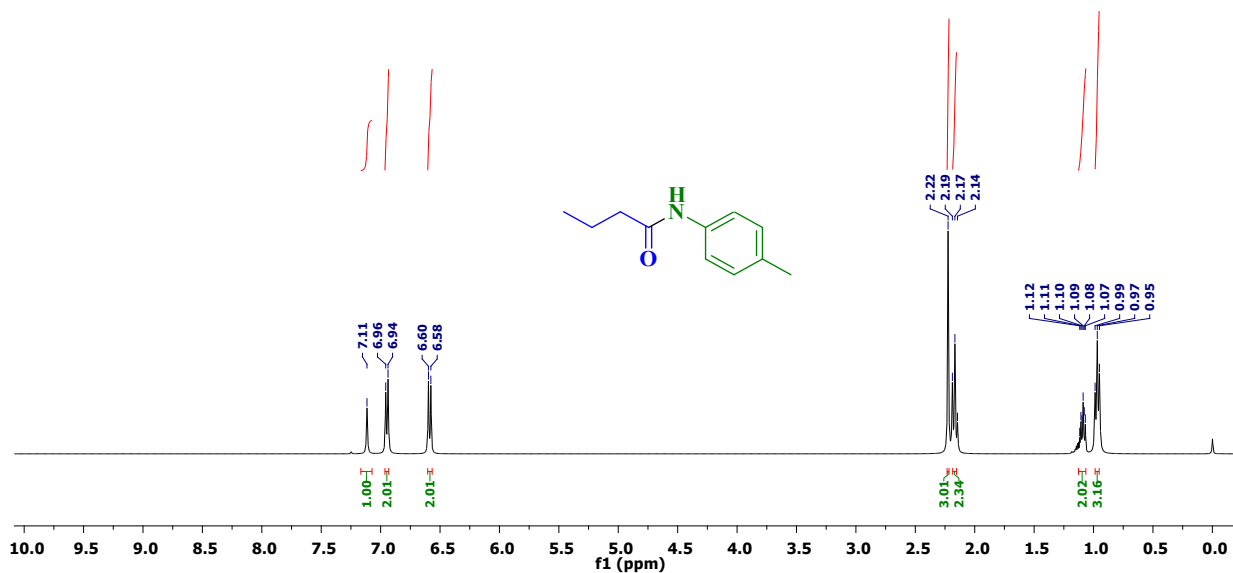

Fig. S15 (a): <sup>1</sup>H-NMR of N-(p-tolyl)propionamide

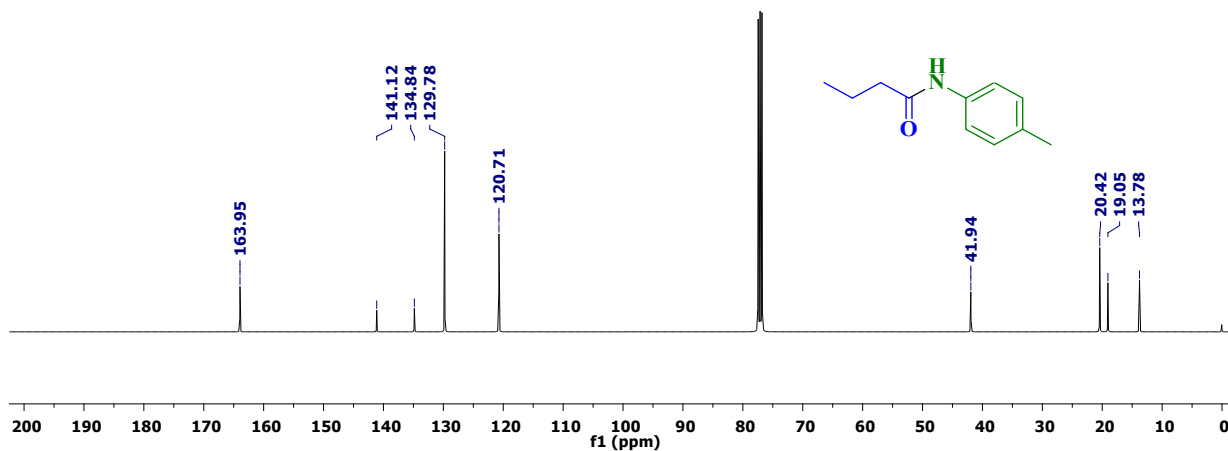

Fig. S15 (b): <sup>13</sup>C-NMR of N-(p-tolyl)propionamide

## 16. 4-fluoro-N-propylbenzamide

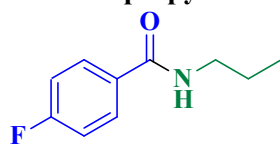

Yellowish Liquid

**<sup>1</sup>H-NMR (400 MHz, CDCl<sub>3</sub>):** δ 8.21 (s, 1H), 7.68-7.72 (m, 2H), 7.06 (t, 2H, J = 8.8 Hz), 3.54 (t, 2H, J = 6.8 Hz), 1.67-1.73 (m, 2H), 0.93 (t, 3H, J = 7.2 Hz) ppm. **<sup>13</sup>C-NMR (75 MHz, CDCl<sub>3</sub>):** δ 165.49, 162.99, 132.70, 129.98, 129.89, 115.81, 115.59, 63.46, 24.11, 11.90 ppm. **HRMS (ES):** Calcd: 181.0903. Found: 182.0908 [M+H]<sup>+</sup> and 183.0914 [MH+2]<sup>+</sup>.

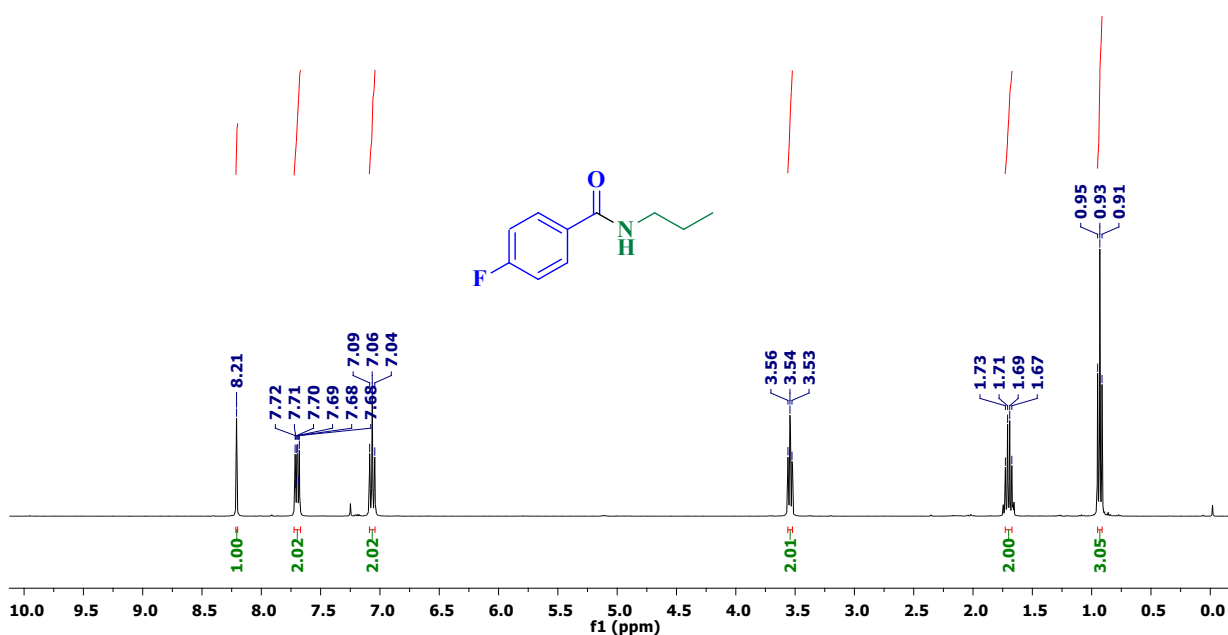

Fig. S16 (a): <sup>1</sup>H-NMR of 4-fluoro-N-propylbenzamide

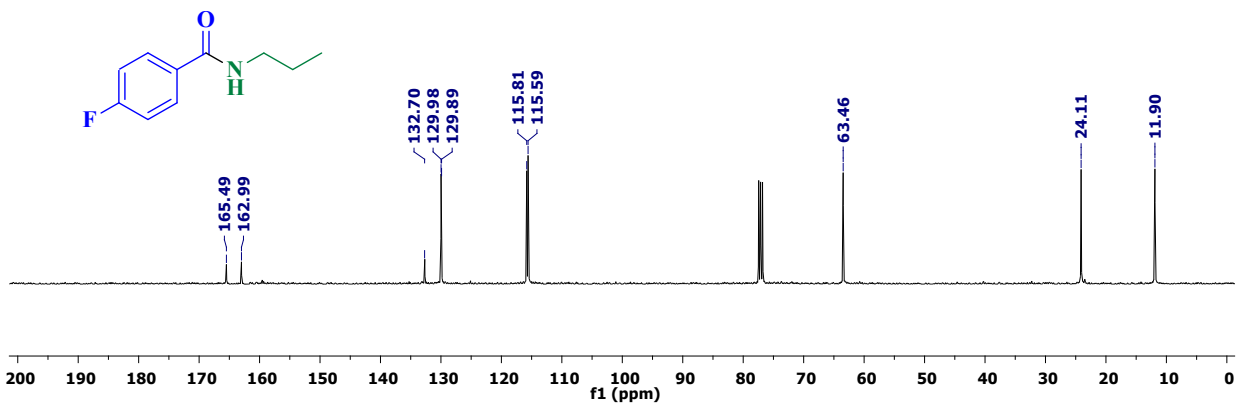

Fig. S16 (b): <sup>13</sup>C-NMR of 4-fluoro-N-propylbenzamide

## 17. 2-hydroxy-3-methoxy-N-pentylbenzamide

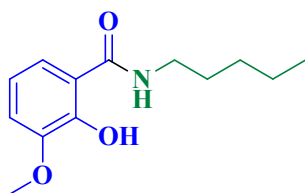

Yellowish Liquid

**<sup>1</sup>H-NMR (400 MHz, CDCl<sub>3</sub>):** δ 8.20 (s, 1H), 6.81 (d, 1H, J = 8 Hz), 6.77 (d, 1H, J = 8 Hz), 6.68 (t, 1H, J = 8 Hz), 3.80 (s, 3H), 3.48 (t, 2H, J = 6.8 Hz), 1.56-1.63 (m, 2H), 1.24-1.32 (m, 4H) 0.83 (t, 3H, J = 7.2 Hz) ppm. **<sup>13</sup>C-NMR (75 MHz, CDCl<sub>3</sub>):** δ 164.56, 153.09, 148.73, 122.82, 118.35, 117.43, 113.71, 58.60, 56.00, 30.52, 29.28, 22.43, 14.02 ppm. **HRMS (ES):** Calcd: 237.1365. Found: 238.1358 [M+H]<sup>+</sup> and 239.1362 [MH+2]<sup>+</sup>.

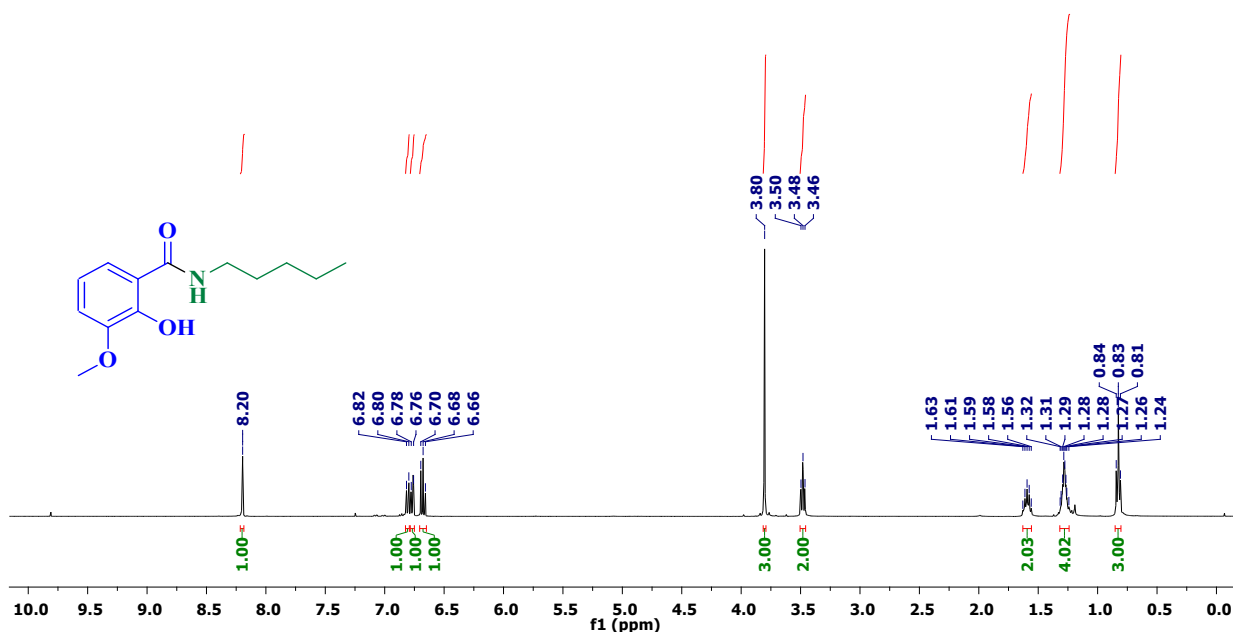

Fig. S17 (a): <sup>1</sup>H-NMR of 2-hydroxy-3-methoxy-N-pentylbenzamide

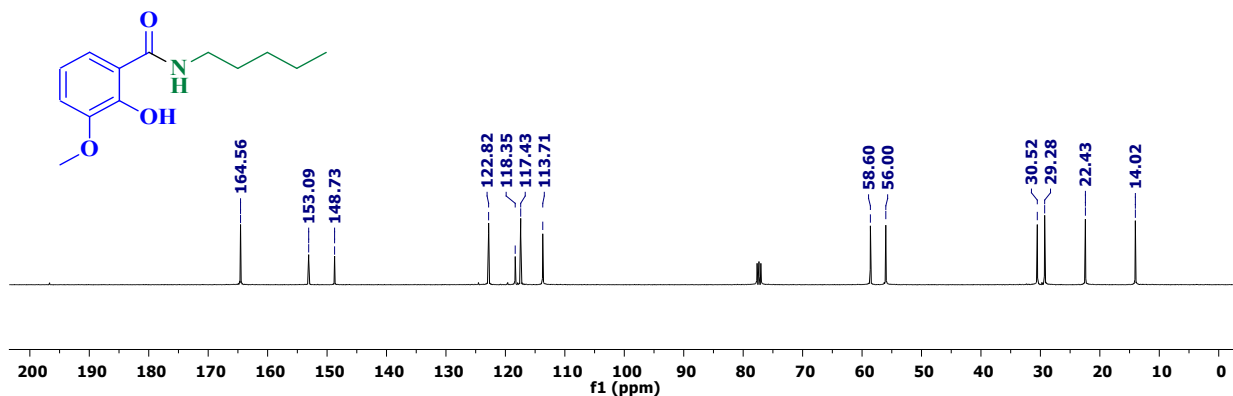

Fig. S17 (b): <sup>13</sup>C-NMR of 2-hydroxy-3-methoxy-N-pentylbenzamide

## 18. 4-nitro-N-pentylbenzamide

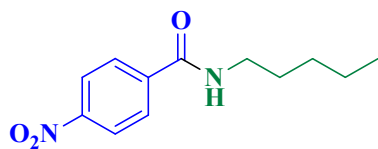

Yellowish Liquid

**<sup>1</sup>H-NMR (400 MHz, CDCl<sub>3</sub>):** δ 8.32 (s, 1H), 8.21 (d, 2H, J = 8.4 Hz), 7.86 (d, 2H, J = 8.8 Hz), 3.63 (t, 2H, J = 7.2 Hz), 1.65-1.72 (m, 2H), 1.31-1.33 (m, 4H), 0.87 (t, 3H, J = 6.8 Hz) ppm. **<sup>13</sup>C-NMR (75 MHz, CDCl<sub>3</sub>):** δ 158.49, 148.92, 141.92, 128.75, 123.90, 62.04, 30.48, 29.60, 22.54, 14.10 ppm. **HRMS (ES):** Calcd: 236.1161. Found: 237.1155 [M+H]<sup>+</sup> and 238.1167 [MH+2]<sup>+</sup>.

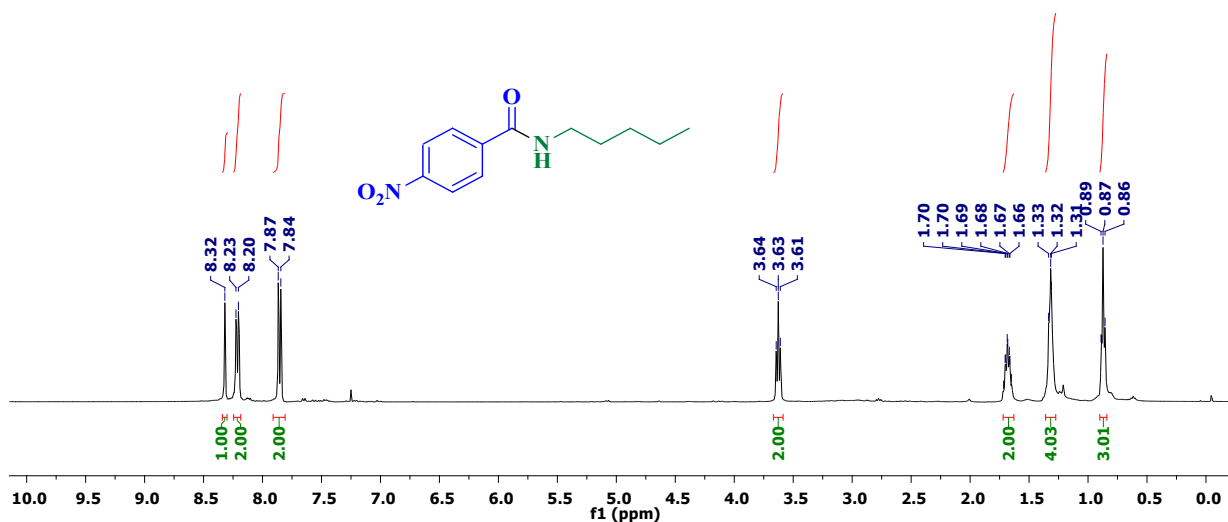

Fig. S18 (a): <sup>1</sup>H-NMR of 4-nitro-N-pentylbenzamide

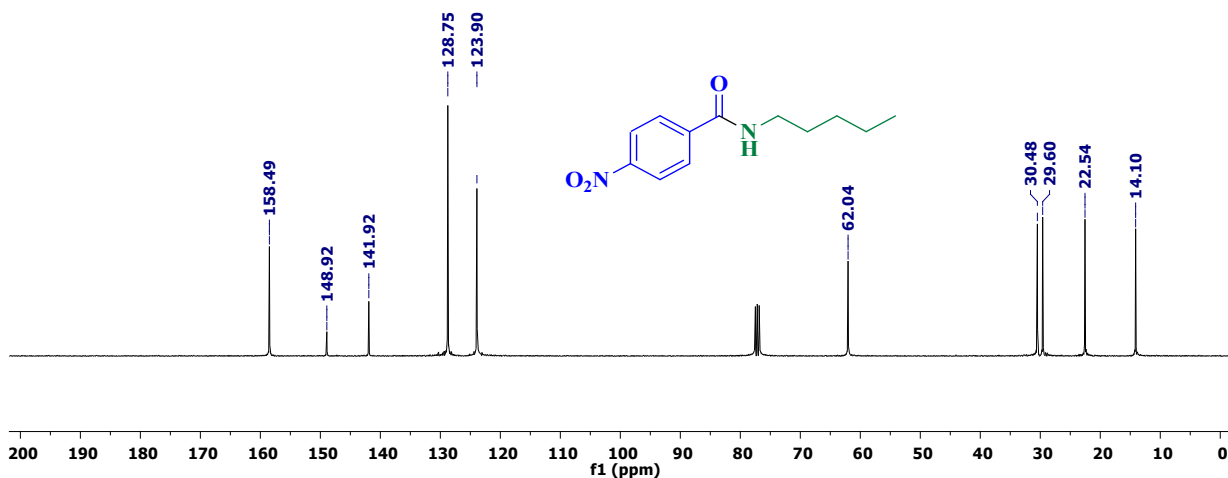

Fig. S18 (b): <sup>13</sup>C-NMR of 4-nitro-N-pentylbenzamide

## 19. 3,4,5-trimethoxy-N-pentylbenzamide

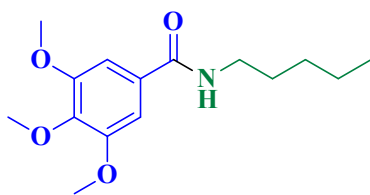

Yellowish Liquid

**<sup>1</sup>H-NMR (400 MHz, CDCl<sub>3</sub>):** δ 7.99 (s, 1H), 6.82-6.85 (m, 2H), 3.69-3.76 (m, 9H), 3.39-3.46 (m, 2H), 1.52-1.55 (m, 2H), 1.17-1.19 (m, 4H), 0.75 (s, 3H) ppm. **<sup>13</sup>C-NMR (75 MHz, CDCl<sub>3</sub>):** δ 160.31, 153.31, 139.91, 131.87, 104.88, 61.54, 60.74, 56.04, 40.78, 30.57, 29.47, 22.45, 14.03 ppm. **HRMS (ES):** Calcd: 281.1627. Found: 282.1632 [M+H]<sup>+</sup> and 283.1638 [MH+2]<sup>+</sup>.

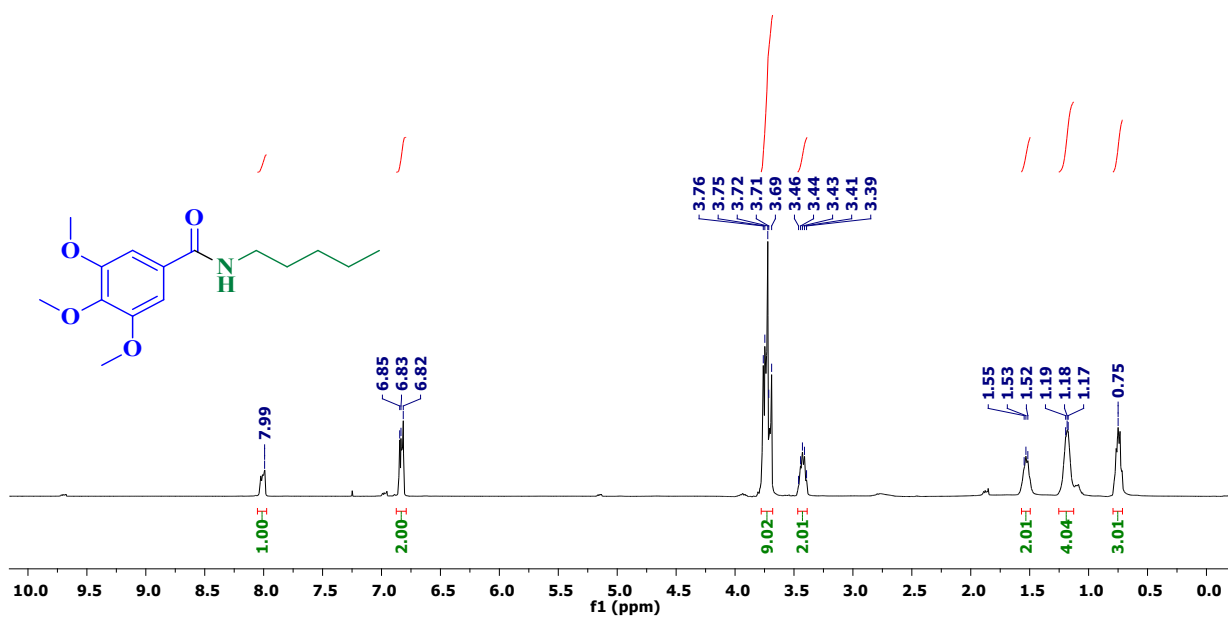

Fig. S19 (a): <sup>1</sup>H-NMR of 3,4,5-trimethoxy-N-pentylbenzamide

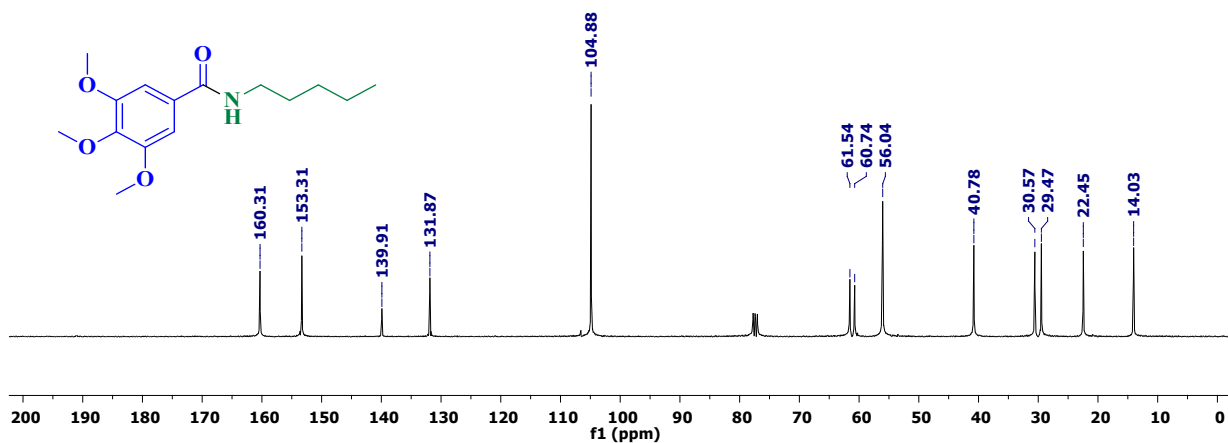

Fig. S19 (b): <sup>13</sup>C-NMR of 3,4,5-trimethoxy-N-pentylbenzamide

## 20. N-pentylthiophene-2-carboxamide

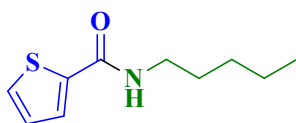

Brownish Liquid

**<sup>1</sup>H-NMR (400 MHz, CDCl<sub>3</sub>):** δ 8.32 (s, 1H), 7.34 (d, 1H, J = 4.8 Hz), 7.25 (d, 1H, J = 3.2 Hz), 7.02-7.04 (m, 1H), 3.53 (t, 2H, J = 6.8 Hz), 1.64 (m, 2H), 1.29-1.34 (m, 4H), 0.88 (t, 3H, J = 7.2 Hz) ppm. **<sup>13</sup>C-NMR (75 MHz, CDCl<sub>3</sub>):** δ 153.99, 142.73, 130.10, 128.57, 127.35, 61.50, 30.63, 29.60, 22.58, 14.13 ppm. **HRMS (ES):** Calcd: 197.0874. Found: 198.0879 [M+H]<sup>+</sup> and 199.0881[MH+2]<sup>+</sup>.

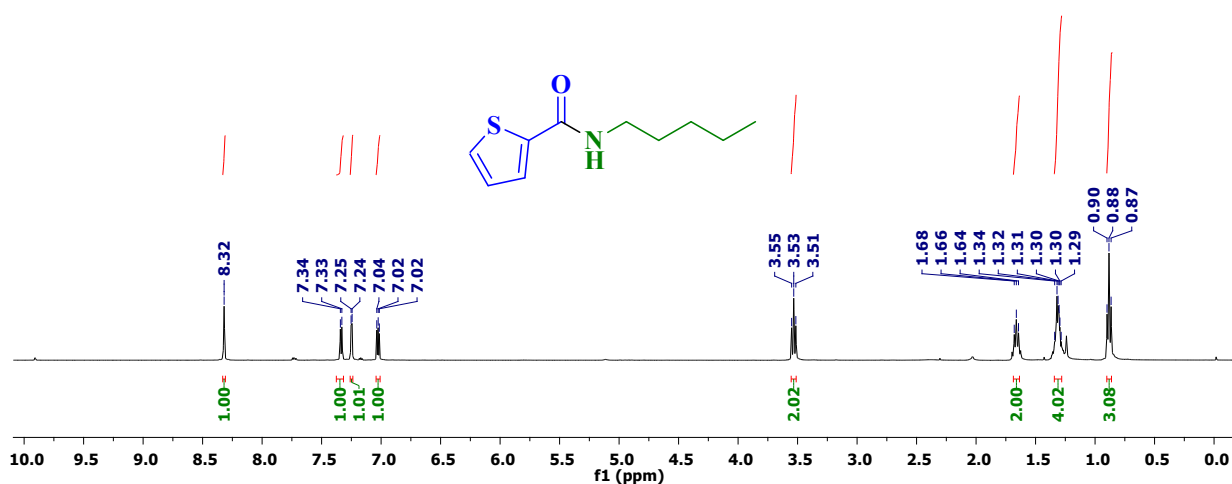

Fig. S20 (a): <sup>1</sup>H-NMR of N-pentylthiophene-2-carboxamide

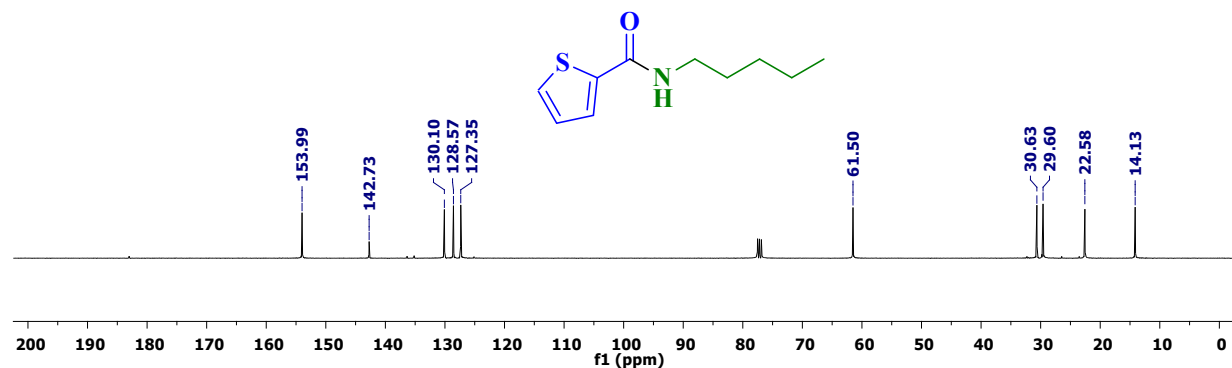

Fig. S20 (b): <sup>13</sup>C-NMR of N-pentylthiophene-2-carboxamide

## 21. 4-fluoro-N-octylbenzamide

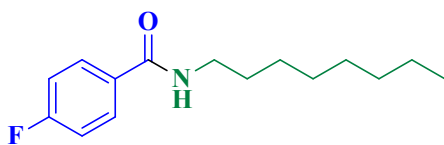

Yellowish Liquid

**$^1\text{H-NMR}$  (400 MHz,  $\text{CDCl}_3$ ):**  $\delta$  8.22 (s, 1H), 7.61 (d, 2H,  $J = 8$  Hz), 7.20 (d, 2H,  $J = 8$  Hz), 3.58 (t, 2H,  $J = 6.8$  Hz), 1.67 (m, 2H), 1.27-1.32 (m, 10H), 0.87 (t, 3H,  $J = 6.4$  Hz) ppm.  **$^{13}\text{C-NMR}$  (75 MHz,  $\text{CDCl}_3$ ):**  $\delta$  160.73, 140.69, 133.73, 129.39, 128.02, 61.78, 31.86, 30.96, 29.43, 29.28, 27.37, 22.67, 21.46, 14.10 ppm. **HRMS (ES):** Calcd: 251.1685. Found: 252.1692  $[\text{M}+\text{H}]^+$  and 253.1697  $[\text{M}+\text{H}+2]^+$ .

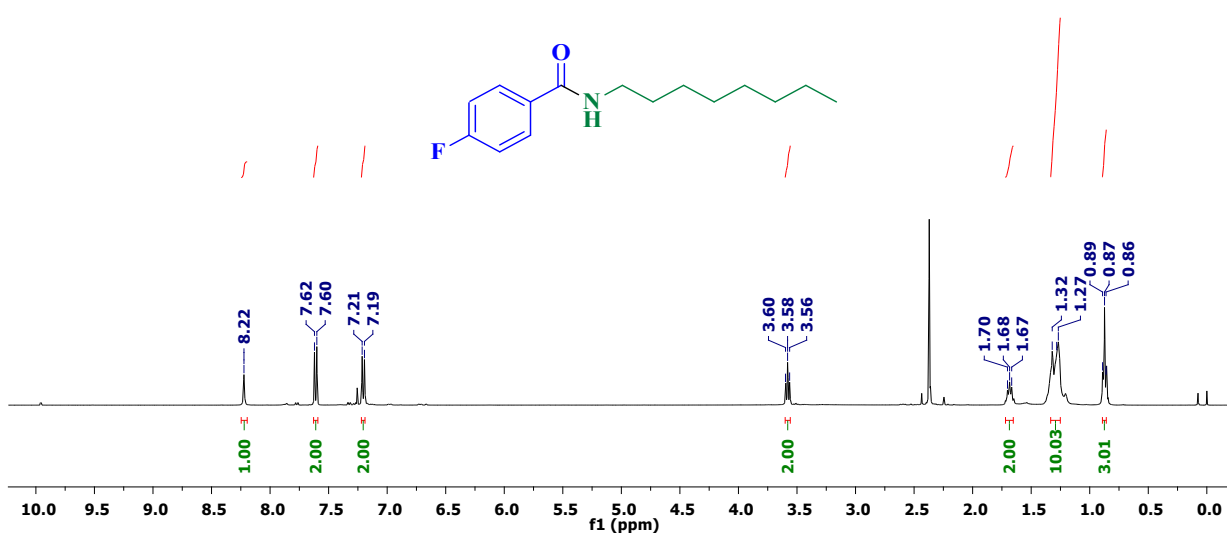

Fig. S21 (a):  $^1\text{H-NMR}$  of 4-fluoro-N-octylbenzamide

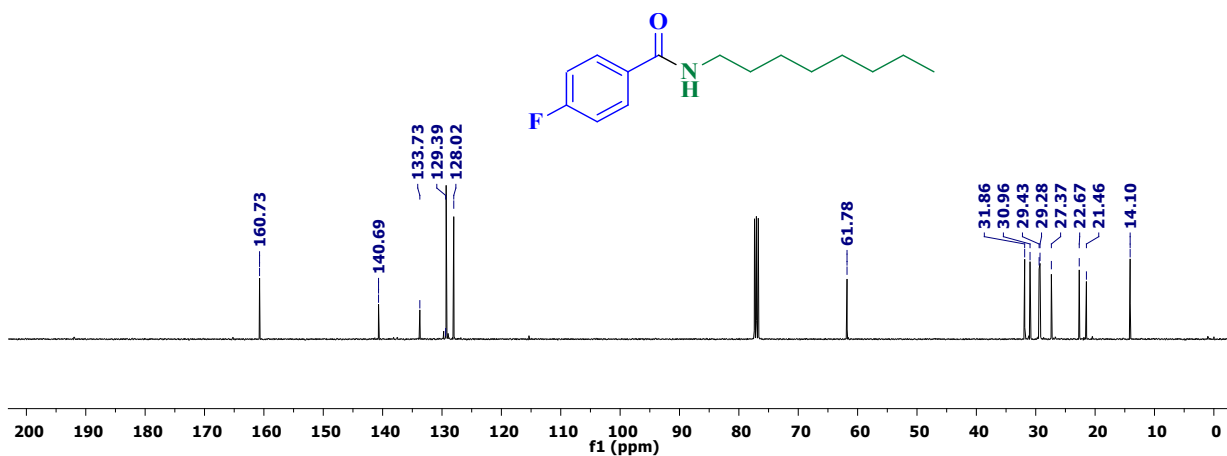

Fig. S21 (b):  $^{13}\text{C-NMR}$  of 4-fluoro-N-octylbenzamide

## 22. 4-methoxy-N-octylbenzamide

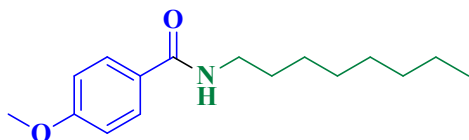

Yellowish Liquid

**<sup>1</sup>H-NMR (400 MHz, CDCl<sub>3</sub>):** δ 8.18 (s, 1H), 7.65 (d, 2H, J = 8.8 Hz), 6.90 (d, 2H, J = 8.8 Hz), 3.82 (s, 3H) 3.55 (t, 2H, J = 7.2 Hz), 1.63-1.68 (m, 2H), 1.25-1.30 (m, 10H), 0.87 (t, 3H, J = 6.8 Hz) ppm. **<sup>13</sup>C-NMR (75 MHz, CDCl<sub>3</sub>):** δ 161.53, 160.18, 129.62, 129.37, 114.02, 61.80, 55.42, 31.94, 31.10, 29.51, 29.36, 27.44, 22.75, 14.19 ppm. **HRMS (ES):** Calcd: 263.1885. Found: 264.1889 [M+H]<sup>+</sup> and 265.1893 [MH+2]<sup>+</sup>.

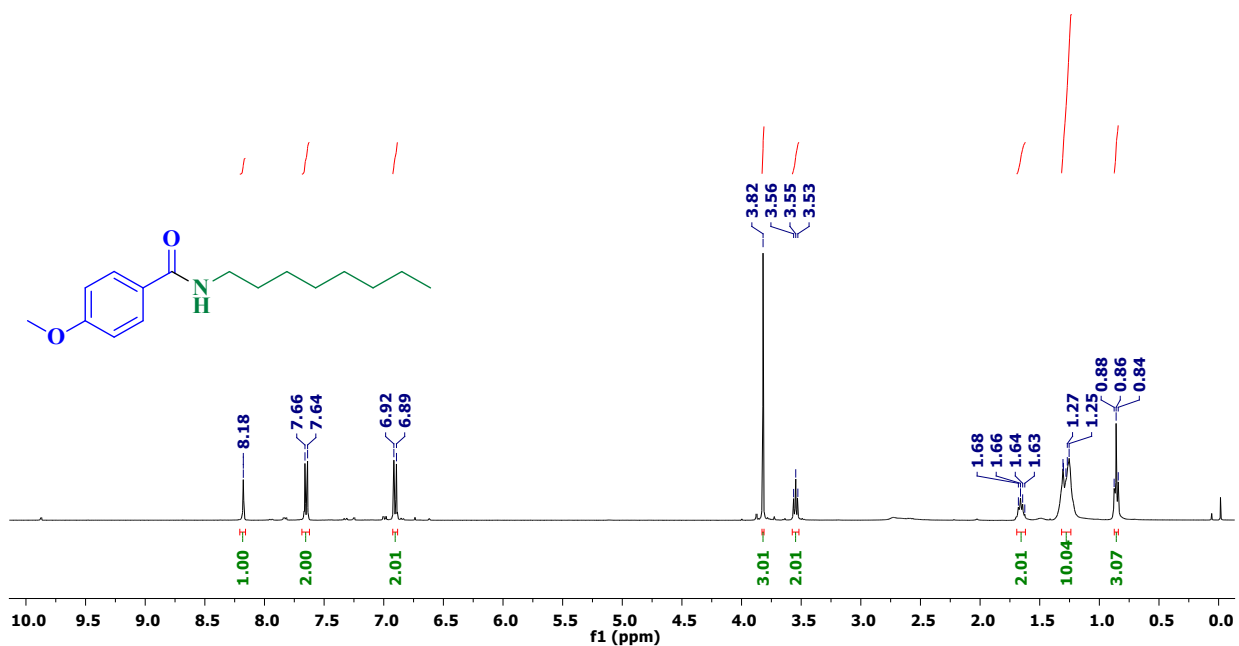

Fig. S22 (a): <sup>1</sup>H-NMR of 4-methoxy-N-octylbenzamide

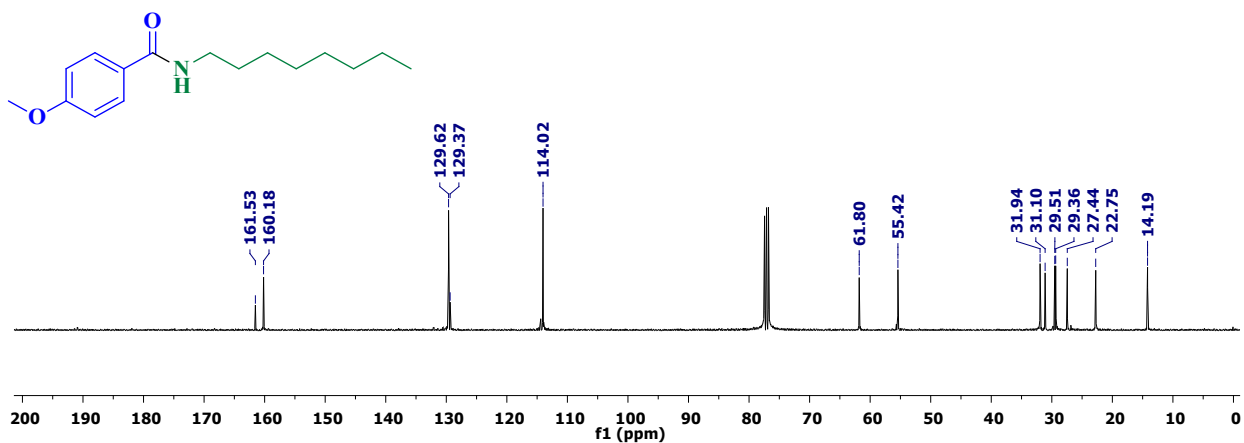

Fig. S22 (b): <sup>13</sup>C-NMR of <sup>1</sup>H-NMR of 4-methoxy-N-octylbenzamide



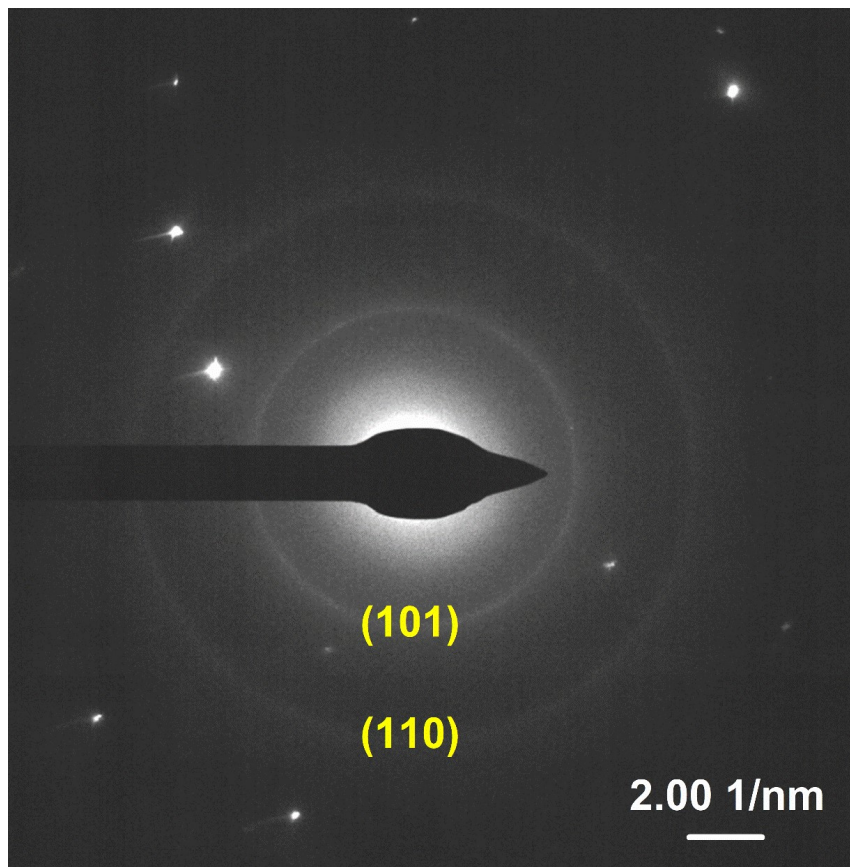

Fig. S23: SAED pattern of PGO-NH<sub>2</sub>@PdO nano-catalyst.

### Calculation of green chemistry matrices

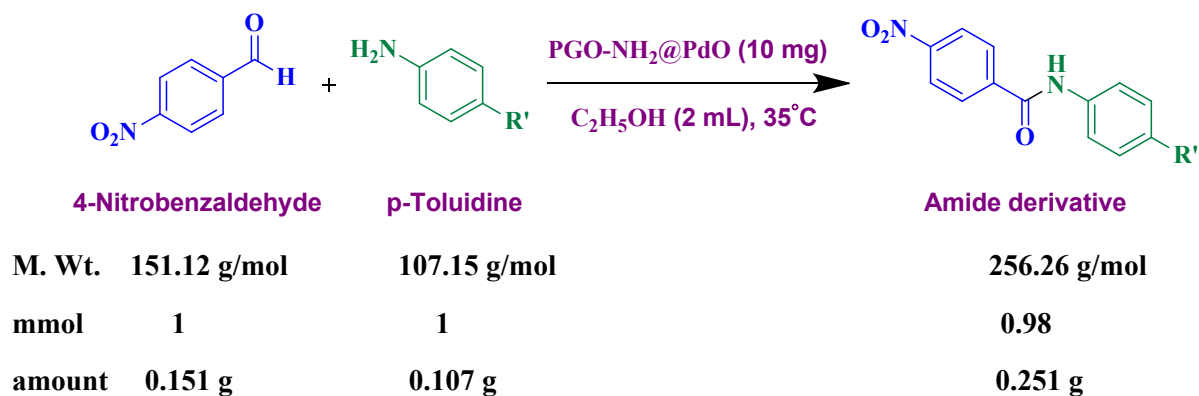

a) **E-factor:**

$$\frac{(Total\ mass\ of\ stoichiometric\ reactant) - (Total\ mass\ of\ product)}{Mass\ of\ product}$$

$$E\text{-factor} = (0.151 + 0.107) - (0.251)/0.251 \\ = 0.028$$

b) **Atom Economy (AE):**  $\frac{[M.W.\ of\ product / \sum (M.W.\ of\ stoichiometric\ reactants)]}{X\ 100}$

$$AE = [256.26 / (151.12 + 107.15)] \times 100 \\ = 99.22\%$$

c) **Carbon Efficiency (CE):**

$$\frac{[(No.\ of\ moles\ of\ product)(No.\ of\ carbon\ in\ product)]}{\sum [(No.\ of\ moles\ of\ reactant)(No.\ of\ carbon\ in\ reactant)]} \times 100 \\ \frac{(0.98 \times 13)}{[(1 \times 7) + (1 \times 6)]} \times 100 = 98\%$$

d) **Process Mass Intensity (PMI):**

$$\frac{\sum (Mass\ of\ stoichiometric\ reactants)}{Mass\ of\ product} \\ \frac{(0.151 + 0.107)}{0.251} = 1.028$$

$$PMI = E\text{-factor} + 1 = 0.028 + 1 = 1.028 \quad (\text{Alternatively})$$

e) **Reaction Mass Efficiency (RME):**

$$\frac{X\ 100}{\sum (Mass\ of\ stoichiometric\ reactants)} \\ \frac{0.251}{(0.151 + 0.107)} \times 100 = 97.29\%$$

**Table S1:** CHNS analysis of GO, PGO-COOH, PGO-COCl, PGO-NH<sub>2</sub> and PGO-NH<sub>2</sub>@PdO.

| Entry | Sample (10 mg) | Nitrogen (wt %) | Carbon (wt %) | Hydrogen (wt %) |
|-------|----------------|-----------------|---------------|-----------------|
|-------|----------------|-----------------|---------------|-----------------|

|    |                          |      |       |      |
|----|--------------------------|------|-------|------|
| 1. | GO                       | 0.68 | 60.31 | 4.49 |
| 2. | PGO-COOH                 | 0.42 | 49.92 | 2.89 |
| 3. | PGO-COCl                 | 2.49 | 25.89 | 3.39 |
| 4. | PGO-NH <sub>2</sub>      | 8.67 | 40.03 | 3.74 |
| 5. | PGO-NH <sub>2</sub> @PdO | 8.54 | 41.23 | 3.15 |

**Table S2:** A comparison of the TON and TOF of PGO-NH<sub>2</sub>@PdO nano-catalyst with several heterogeneous catalysts previously reported for amide derivative synthesis.

| S. N. | Catalyst (amount)                                                                                                                            | Reactants                                                                           | Product                                                                             | Time   | TON    | TOF     | Ref.      |
|-------|----------------------------------------------------------------------------------------------------------------------------------------------|-------------------------------------------------------------------------------------|-------------------------------------------------------------------------------------|--------|--------|---------|-----------|
| 1.    | SiO <sub>2</sub> @APTES@Pd-FFR<br>(20 mg)                                                                                                    | 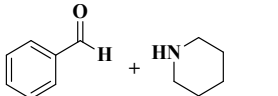   |    | 1.5 h  | 414    | 276     | 1         |
| 2.    | [Ru(L <sub>1</sub> )Cl(CO)(PPh <sub>3</sub> ) <sub>2</sub> ]<br>(1 mol%)                                                                     |    |    | 12 h   | 9800   | 817     | 2         |
| 3.    | [Ru(L1)(CO)Cl(AsPh <sub>3</sub> ) <sub>2</sub> ]<br>(2.98 X 10 <sup>-4</sup> mol)                                                            |   |   | 18 h   | 188    | 10.4    | 3         |
| 4.    | [(η <sup>6</sup> -C <sub>10</sub> H <sub>14</sub> )-RuCl <sub>2</sub> (C <sub>6</sub> H <sub>5</sub> NH <sub>2</sub> )]<br>(0.017 g, 5 mol%) |  |  | 5 h    | 19.60  | 3.92    | 4         |
| 5.    | PGO-NH <sub>2</sub> @PdO<br>(10mg)                                                                                                           |  |  | 20 min | 445.45 | 1349.85 | This Work |

## References

- (1) R. K. Sharma and S. Sharma, Silica Nanosphere-Supported Palladium(II) Furfural Complex as a Highly Efficient and Recyclable Catalyst for Oxidative Amination of Aldehydes. *Dalt. Trans.* 2014, **43**, 1292–1304.
- (2) G. Vinoth, S. Indira, M. Bharathi, M. Sounthararajan, D. Sakthi, K. S. Bharathi, Appraisal of Ruthenium ( II ) Complexes of ( 4-Phenoxyphenylazo ) Ligands for the Synthesis of Primary Amides by Dint of Hydroxylamine Hydrochloride and Aldehydes. *J. Organomet.*

- Chem.* 2019, **894**, 67–77.
- (3) R. N. Prabhu and R. Ramesh, Structure and Facile One-Pot Conversion of Aldehydes to Amides. *RSC Advances* 2012, **2**, 4515–4524.
- (4) D. Tyagi R. K. Rai A. D. Dwivedi, S. M. Mobin and S. K. Singh, Phosphine-free Ruthenium-Arene Complex for Low Temperature One-Pot Catalytic Conversion of Aldehydes to Primary Amides in Water. *Inorg. Chem. Front.* 2015, **2**, 116.
